# Supplementary material for: Restriction site-associated DNA sequencing for SNP discovery and high-density genetic map construction in southern catfish (Silurus meridionalis)
Source: R Soc Open Sci. 2018 May 30;5(5):172054. doi: 10.1098/rsos.172054 (PMC5990832; doi:10.1098/rsos.172054)
Supplement: Additional file 4 [file rsos172054supp4.xlsx]

## Sheet: Sheet1
Additional file 4: The putative SNPs between two parents
Contig Name	SNP_Postion	Pfemale_Genotype	Pfemale_Qvalue	Pfemale_Depth	Pmale_Genotype	Pmale_Qvalue	Pmale_Depth
E17283_L671	325	C/T	99	109	C/T	99	186
E17283_L671	326	C	29	109	C/T	37	186
E17283_L671	338	G	68	105	A/G	99	172
E17283_L671	408	C	26	29	C/T	55	70
E25583_L649	262	T	99	43	G/T	33	35
E25583_L649	360	A/T	99	42	A	74	65
E25583_L649	577	A/C	99	71	C	99	121
E276811_L609	258	A/G	32	6	A/G	99	24
E38856_L609	390	A/C	33	8	A	41	7
E38856_L609	472	A/G	78	13	G	99	28
E29408_L608	108	A/G	25	13	G	36	17
E52192_L602	162	A/G	65	19	G	44	5
E119190_L588	366	A/G	68	19	A/G	38	27
E119190_L588	532	C/T	83	14	C/T	55	20
E13662_L574	135	C/G	48	39	C/G	62	76
E13662_L574	157	G/T	43	48	G/T	69	89
E13662_L574	361	A/T	35	127	A/T	31	152
E79339_L565	2	A/C	31	22	A	44	26
E68105_L556	411	A/G	55	26	A/G	99	28
E95649_L555	494	T	65	12	C/T	28	19
E24239_L554	333	A/G	35	23	G	58	63
E126367_L551	419	A	36	6	A/G	93	50
E148920_L545	250	A/G	86	17	A/G	99	18
E2108_L543	137	C/G	36	77	C/G	64	113
E4905_L526	490	G	48	11	A/G	99	26
E230244_L523	401	G/T	63	24	G/T	99	47
E36981_L521	168	A/G	31	8	A	96	23
E36981_L521	370	G/T	27	11	T	76	16
E64008_L513	57	A/G	26	7	A/G	99	22
E64008_L513	187	G	99	45	A/G	69	49
E71990_L508	152	T	53	10	G/T	99	24
E274765_L500	321	C/T	52	9	C	35	13
E42555_L498	189	G/T	50	12	G	29	11
E174402_L495	355	A/G	60	10	A	47	6
E13102_L495	155	G/T	67	16	G/T	79	29
E13102_L495	453	A/G	71	17	A/G	99	45
E13102_L495	477	C/T	53	10	C/T	39	17
E28257_L494	426	C	88	22	C/T	55	36
E116675_L492	148	A/C	43	7	A	29	11
E116675_L492	150	C/T	45	9	C	29	11
E20478_L491	281	C	99	80	A/C	99	29
E17661_L490	111	C/G	99	18	G	92	27
E33009_L487	372	G	53	8	A/G	99	21
E27161_L483	42	A/C	44	65	A	85	48
E27161_L483	183	A/G	37	171	A/G	99	171
E249653_L481	251	G	35	13	A	80	17
E249653_L481	312	G/T	46	22	G	99	35
E127848_L479	363	G/T	56	17	T	50	15
E189227_L476	271	C/G	35	19	G	70	30
E189227_L476	328	A/G	99	21	G	76	16
E311373_L472	373	C	59	10	C/T	99	32
E241241_L470	205	A	62	62	A/T	84	74
E241241_L470	405	A/T	30	25	A/T	99	25
E195269_L470	127	C/T	99	16	T	90	21
E195269_L470	138	A/G	99	14	A	88	21
E141303_L470	428	A/T	30	7	T	53	9
E5655_L470	159	G/T	78	13	G	79	17
E152932_L468	401	A/C	99	24	C	91	21
E152932_L468	419	T	62	13	C/T	79	13
E142655_L468	357	C/T	47	14	C	80	17
E142655_L468	368	C/T	48	11	T	65	12
E13653_L465	255	A	52	13	A/C	42	18
E13653_L465	278	G/T	28	7	G	60	16
E270708_L462	271	G/T	25	10	G	56	9
E233763_L459	187	C/T	31	9	C	26	13
E233763_L459	335	C/T	44	12	C	32	12
E36042_L458	109	A	38	40	A/G	38	103
E36042_L458	140	C/T	99	61	C/T	99	144
E36042_L458	212	A/G	72	58	A/G	99	108
E214291_L455	269	T	44	9	C/T	51	13
E214291_L455	270	G	44	9	A/G	27	13
E94190_L455	223	A	31	11	A/G	99	29
E343689_L453	150	C/G	48	10	C	64	24
E193728_L453	244	C/T	38	5	C	40	15
E260687_L452	257	A/G	75	15	A	76	16
E156561_L450	261	C/T	99	16	T	94	23
E81878_L450	280	C/T	97	12	T	82	31
E25139_L450	213	C/G	39	7	C/G	62	18
E25139_L450	244	A/T	57	9	A/T	51	22
E34365_L449	33	G/T	29	32	T	44	20
E34365_L449	47	A/T	35	36	T	47	23
E34365_L449	131	A/T	33	46	A/T	58	64
E34365_L449	190	C	84	61	C/T	55	97
E34365_L449	208	A	74	59	A/T	27	96
E22333_L449	219	A/G	45	13	A/G	42	20
E52789_L448	61	A/T	31	6	A/T	99	25
E52789_L448	196	C	85	26	A/C	58	64
E247575_L445	231	C/T	99	12	T	47	6
E144365_L445	75	T	68	13	C/T	99	14
E134836_L445	175	C/G	99	16	G	76	16
E134836_L445	228	C	38	14	C/T	99	31
E162642_L444	158	A/G	90	14	G	99	44
E569_L443	258	A/C	27	7	A	94	22
E254141_L442	233	C/T	39	7	C	35	13
E67717_L442	217	A/C	99	22	C	99	30
E66592_L442	119	C	67	13	T	47	17
E300669_L440	123	C/T	42	14	T	50	7
E300669_L440	288	C/G	85	13	C	73	15
E139602_L440	168	A/C	34	6	A	58	11
E589_L439	326	G	73	15	T	41	15
E104453_L438	135	A/G	91	17	A/G	99	17
E56594_L438	187	A/C	69	10	C	99	33
E282479_L437	237	C/T	55	10	C	99	36
E267414_L437	215	C/T	28	5	C	27	10
E145925_L437	189	G/T	99	23	G	99	25
E112725_L437	272	G/T	28	6	T	68	13
E62846_L437	213	G/T	93	19	G	99	33
E62846_L437	281	A/G	37	7	G	73	15
E230778_L436	112	A/G	34	6	G	88	21
E54194_L436	133	A/G	34	17	A/G	99	23
E43239_L436	128	C/T	99	28	C/T	99	83
E43239_L436	204	C/G	75	55	C/G	99	131
E43239_L436	239	A/G	66	44	A/G	99	109
E188837_L435	220	A/G	99	17	G	92	22
E141259_L435	232	C	49	14	C/T	57	28
E49687_L435	177	C/T	42	17	T	56	9
E49687_L435	211	A/T	50	10	A	30	11
E23144_L435	199	A/C	70	11	A/C	53	16
E23144_L435	206	A/G	38	11	A/G	35	16
E23144_L435	229	A/G	25	8	A/G	76	15
E202166_L434	202	A/G	48	9	A	99	30
E55600_L434	213	T	47	11	C/T	36	20
E31836_L434	136	C/G	99	61	G	93	23
E6496_L434	360	G	87	48	A/G	54	55
E6496_L434	390	A	44	16	A/G	62	17
E30459_L433	144	G	82	19	G/T	99	23
E226689_L432	288	C/G	41	7	C	31	13
E160110_L432	181	G/T	48	19	G/T	72	30
E23127_L432	109	A/T	37	27	T	28	51
E23127_L432	290	A/G	54	11	A	79	17
E280592_L431	290	C/T	99	21	C	72	16
E233254_L431	168	A/T	57	9	T	38	20
E119648_L431	141	C/G	99	66	C/G	99	59
E119648_L431	171	A	99	53	A/T	69	56
E109694_L431	194	G/T	99	18	T	90	38
E29413_L431	87	A/G	70	30	A/G	52	54
E29413_L431	98	A/T	70	35	A/T	78	58
E29413_L431	117	G/T	70	38	G/T	31	69
E29413_L431	180	A/G	33	19	A/G	32	41
E6481_L431	173	A/C	33	46	C	99	81
E6481_L431	191	G	66	51	A/G	84	88
E6481_L431	391	A	32	5	A/G	34	15
E272585_L430	233	C/G	82	12	G	73	15
E263167_L430	159	A/C	52	13	C	89	21
E136754_L430	117	A/T	81	10	T	94	22
E54297_L430	281	A/G	31	10	G	59	10
E47773_L430	142	C/T	42	6	T	44	16
E47773_L430	286	A/G	62	12	G	62	11
E38278_L430	88	C	34	19	C/T	85	47
E38278_L430	117	A	74	15	A/C	99	39
E38278_L430	290	C/T	51	9	C/T	76	23
E33485_L430	91	A/G	99	38	A/G	99	52
E33485_L430	99	A/G	99	46	A/G	99	65
E33485_L430	118	C/T	99	66	C/T	99	97
E33485_L430	242	C/T	71	146	C/T	99	151
E33485_L430	244	C/T	40	136	C	57	150
E33485_L430	257	G/T	62	121	G/T	69	136
E33485_L430	273	C/T	84	100	C/T	99	104
E19339_L430	227	A/C	99	21	C	99	33
E237570_L429	285	A/G	31	7	A	62	12
E230264_L429	202	C/T	47	8	C	55	20
E119793_L429	196	G/T	99	18	T	62	27
E117309_L429	154	A/C	37	18	C	99	30
E114547_L429	182	C/T	57	11	C	88	20
E104935_L429	240	G/T	81	12	G	26	10
E89305_L429	159	A/C	76	12	C	99	33
E71401_L429	334	A/T	45	31	A	46	62
E63312_L429	140	G/T	51	15	G/T	97	18
E50685_L429	200	C/T	28	19	C	76	16
E50685_L429	206	C/T	35	18	C	78	17
E30534_L429	205	T	99	75	A/T	99	160
E15135_L429	159	C/T	35	10	C	76	16
E3497_L429	226	C/T	82	12	C/T	93	17
E3497_L429	245	A/C	72	18	A	50	19
E3497_L429	256	C/T	76	19	C	30	23
E334911_L428	237	A/G	99	16	A	88	21
E182534_L428	252	A	53	8	A/T	70	18
E138593_L428	112	G/T	82	18	G	89	21
E138593_L428	119	C/T	81	17	C	92	22
E130562_L428	133	A/T	92	19	T	99	26
E130562_L428	252	A/G	82	15	A	62	11
E110681_L428	156	C/T	99	14	C	82	37
E69077_L428	271	A/T	48	11	T	74	15
E61672_L428	78	C/T	99	81	C/T	99	137
E36571_L428	61	G	48	6	A/G	27	6
E36571_L428	132	A/G	99	27	A/G	99	63
E36571_L428	139	A/C	99	31	A/C	99	67
E36571_L428	173	A/C	99	43	C	99	96
E36571_L428	223	G	99	29	A/G	99	58
E28471_L428	105	A/T	99	37	A/T	99	63
E26766_L428	88	G	60	116	G/T	53	146
E26766_L428	92	A/G	99	119	G	83	152
E26766_L428	100	G/T	99	131	G	81	166
E26766_L428	147	C	26	137	C/T	37	198
E19980_L428	78	T	38	12	G/T	48	62
E19980_L428	239	G	56	116	A/G	56	107
E19980_L428	284	C	26	68	C/T	99	40
E19980_L428	288	A/G	27	51	A/G	69	29
E297956_L427	223	A/G	99	20	A	71	15
E297956_L427	241	C/T	72	14	C/T	84	14
E206353_L427	182	C/T	36	11	C	90	21
E206353_L427	227	A/G	99	20	A	52	19
E206353_L427	269	C/T	55	11	C	64	12
E196942_L427	108	A	38	14	A/T	58	15
E125400_L427	190	C	73	15	C/T	80	19
E122954_L427	137	G/T	34	8	G/T	99	24
E122954_L427	163	A/G	43	21	A/G	99	34
E122954_L427	224	A/G	99	20	A/G	99	17
E122798_L427	184	A/G	77	12	G	76	16
E122798_L427	240	C/G	77	11	C/G	98	16
E110712_L427	248	A/T	45	9	A	77	16
E82152_L427	157	A/G	27	7	G	50	7
E79865_L427	160	T	81	19	C	44	16
E56813_L427	268	A/T	28	5	A/T	26	11
E252774_L426	207	A	56	9	A/T	99	19
E205018_L426	217	G/T	69	10	T	70	14
E186573_L426	234	A/G	49	8	A	50	7
E165601_L426	125	A/C	48	9	A	74	15
E147786_L426	94	C/T	52	7	T	53	8
E146565_L426	201	C/T	99	17	T	99	45
E146565_L426	245	A/C	68	13	A	99	28
E141159_L426	189	G/T	91	20	G	71	14
E141159_L426	209	A/G	99	18	A/G	99	15
E71452_L426	247	A/G	99	14	A	99	28
E54434_L426	101	G	52	29	A/G	99	52
E54434_L426	171	C/T	95	32	C/T	99	90
E54434_L426	202	C	35	54	C/T	99	130
E54434_L426	254	A/G	30	54	A/G	99	89
E34196_L426	260	T	33	46	G/T	85	123
E18924_L426	223	G/T	41	74	G/T	54	123
E13174_L426	314	A/C	86	14	A/C	73	21
E298477_L425	124	G/T	43	7	G	78	17
E285145_L425	230	A	67	34	A/G	56	44
E280153_L425	143	A/G	99	30	G	99	85
E280153_L425	190	C/T	99	17	T	99	37
E272045_L425	235	A/G	99	21	G	99	27
E127866_L425	139	A/C	52	11	A/C	99	32
E41160_L425	76	C/G	27	25	C/G	99	29
E41160_L425	97	A	68	31	A/C	67	54
E32621_L425	137	A/G	99	14	G	85	20
E32621_L425	270	A/T	29	7	A	64	12
E25430_L425	173	C/T	30	91	C/T	99	150
E25430_L425	206	A/G	99	90	G	99	146
E15200_L425	247	A/C	56	9	C	83	20
E271866_L424	181	C/T	99	27	C	65	34
E271866_L424	185	C/T	85	27	T	56	33
E255774_L424	235	A/T	99	19	A	71	27
E253441_L424	138	A	47	6	A/G	74	11
E220090_L424	97	C/G	65	8	G	62	11
E220090_L424	268	C/T	31	16	T	54	19
E213968_L424	265	A/G	57	9	G	69	14
E169159_L424	152	A/T	99	16	A	99	29
E157809_L424	178	C/T	57	10	C	91	21
E157809_L424	204	C/T	99	15	C	84	19
E150157_L424	97	A/G	61	8	G	78	17
E125090_L424	190	C/G	33	9	C	52	19
E118129_L424	183	C/G	99	14	C	68	13
E72174_L424	205	C/G	99	19	G	90	21
E71730_L424	184	A/G	99	24	A/G	45	36
E71730_L424	232	A/G	99	20	A/G	46	30
E71730_L424	238	A/G	81	17	A/G	99	29
E45508_L424	156	C/T	61	8	T	99	25
E38454_L424	146	A/T	99	24	T	95	25
E28031_L424	99	C/G	36	6	G	50	7
E1467_L424	253	A/G	50	7	G	53	8
E297265_L423	169	C/G	31	7	C	86	20
E252703_L423	154	A/G	25	19	A	89	23
E212798_L423	175	G	44	16	A	93	22
E212798_L423	251	A/G	49	9	A	80	17
E209034_L423	179	A/C	34	5	C	65	12
E209034_L423	221	A/C	26	7	C	44	5
E189317_L423	202	A/G	99	28	A	98	25
E152340_L423	237	A/T	25	6	T	82	18
E135205_L423	72	C	54	8	C/T	38	16
E135205_L423	224	A/G	86	14	A/G	99	55
E135205_L423	226	A/G	59	13	A/G	99	53
E135205_L423	230	T	32	11	C/T	99	53
E135205_L423	238	G/T	41	7	G/T	35	40
E110704_L423	163	C/T	93	14	C	99	28
E106857_L423	89	T	62	11	C/T	31	17
E106857_L423	149	C/T	36	11	C/T	99	29
E106857_L423	167	A/G	33	9	A/G	63	26
E106857_L423	202	T	44	5	C/T	59	14
E102474_L423	160	C/T	99	29	T	71	14
E102474_L423	276	A/G	32	11	G	62	11
E100577_L423	179	A/T	99	29	T	99	42
E100577_L423	205	A/T	99	21	T	99	39
E100577_L423	233	C/T	80	13	T	99	26
E75257_L423	255	A/T	81	11	A	65	12
E70338_L423	117	C/T	68	20	C	90	22
E52334_L423	45	A/G	99	28	A/G	99	45
E52334_L423	93	A	99	97	A/G	99	174
E52334_L423	161	A/G	44	95	A/G	28	183
E52334_L423	195	C/T	81	92	C/T	99	185
E52334_L423	219	T	60	67	C/T	99	139
E52334_L423	228	A/G	99	56	A/G	99	121
E52334_L423	247	A	82	31	A/G	83	72
E17980_L423	148	C/T	33	10	C	91	22
E9819_L423	151	A/T	53	21	A	70	27
E322932_L422	269	A/T	57	7	A	65	12
E281586_L422	128	G/T	32	6	T	80	17
E281586_L422	204	C/T	38	6	C	99	29
E281586_L422	206	C/T	40	6	C	99	29
E232439_L422	262	A/G	31	11	G	62	11
E186694_L422	195	C	82	18	C/T	99	31
E184567_L422	239	A/G	62	9	G	82	18
E178398_L422	162	C	26	11	A	87	21
E121805_L422	147	G/T	99	20	G	99	48
E119471_L422	182	A/G	87	12	G	99	31
E113717_L422	152	A	51	20	C	99	27
E113717_L422	177	A/T	99	25	T	99	25
E101560_L422	178	A/C	94	16	A	65	25
E83540_L422	81	C/T	44	7	T	56	9
E83540_L422	249	A/C	79	15	A	59	10
E83384_L422	258	A	65	12	A/C	99	26
E61293_L422	108	A/G	37	16	A	39	34
E61293_L422	120	C/T	36	18	C	39	34
E37813_L422	95	A/G	28	14	A	59	18
E37813_L422	128	A/C	26	9	C	59	16
E32108_L422	276	T	70	77	C/T	87	157
E32108_L422	320	A/G	60	41	G	40	85
E27919_L422	195	A/G	99	26	A	99	29
E27919_L422	281	C/T	25	5	T	47	6
E2551_L422	228	A/C	35	6	A/C	39	12
E292198_L421	126	A/G	47	10	G	79	17
E292198_L421	196	C/T	99	13	C	94	24
E266002_L421	212	G	56	10	G/T	99	22
E251748_L421	214	A/G	71	14	G	74	15
E241651_L421	187	A/T	32	8	A	65	25
E224896_L421	111	A/C	97	16	C	85	19
E223973_L421	175	C/T	90	15	T	81	31
E193855_L421	229	C/T	83	16	C	99	33
E193855_L421	251	A/G	71	9	G	99	29
E188655_L421	111	C/T	87	18	T	44	16
E185246_L421	149	A/G	99	22	G	92	24
E172551_L421	120	A	68	13	A/G	99	17
E165998_L421	228	A/T	41	7	A	99	25
E161998_L421	191	C/T	74	12	C	85	19
E161162_L421	95	C/T	29	8	C	74	15
E161162_L421	138	C/T	52	8	C	83	18
E133521_L421	101	C/T	31	10	C	77	16
E106333_L421	232	C/T	75	132	C	99	70
E97269_L421	254	T	73	16	C/T	99	32
E82397_L421	157	A/G	32	9	A	43	16
E82397_L421	253	C/T	78	9	T	44	5
E74455_L421	231	A/G	32	11	G	76	16
E57648_L421	80	A/T	33	22	A	25	43
E57648_L421	124	G	61	20	A/G	64	39
E57648_L421	206	A/G	50	8	A	81	18
E48192_L421	205	A/G	68	21	G	99	34
E48192_L421	224	C/T	33	17	C	99	33
E42900_L421	176	C/T	94	16	T	90	21
E24517_L421	166	A/T	42	16	A/T	36	53
E2819_L421	263	C/T	73	11	C	68	13
E310302_L420	191	C/T	41	6	C	49	7
E301334_L420	220	A/G	41	11	G	99	30
E299421_L420	172	C/T	63	12	T	90	21
E266642_L420	191	C/G	55	11	G	88	20
E251383_L420	195	A/G	99	20	G	91	22
E251383_L420	229	A/C	99	14	C	82	18
E250441_L420	263	G	26	66	A/G	80	182
E242945_L420	145	A/C	74	9	C	38	14
E215059_L420	124	A/C	99	25	C	99	27
E209948_L420	196	A/C	99	20	A	58	21
E209948_L420	238	C/T	48	9	C/T	99	24
E203971_L420	214	A/C	99	21	C	99	39
E191917_L420	234	A/C	99	18	C	80	17
E181337_L420	230	A/T	63	8	A	29	11
E160466_L420	191	A/G	53	8	G	81	18
E153362_L420	140	C/T	38	13	T	65	12
E129908_L420	222	G	90	22	A	65	24
E123560_L420	166	A/T	46	9	A	83	18
E111676_L420	248	T	60	22	C/T	99	77
E72586_L420	98	A/G	99	13	G	35	13
E56033_L420	126	A/C	92	15	A	99	33
E55181_L420	69	A/C	25	31	A	92	115
E55181_L420	179	A	99	58	A/T	44	184
E55181_L420	279	C/T	99	43	C/T	99	151
E51930_L420	159	G	99	59	C/G	99	111
E49714_L420	159	G/T	99	17	G	99	45
E49714_L420	164	A/T	99	20	T	99	47
E29079_L420	196	A/C	46	10	C	96	23
E20580_L420	198	A/G	48	7	G	99	26
E15368_L420	266	C	33	45	A/C	28	36
E13082_L420	33	G	62	14	A/G	30	24
E13082_L420	53	G/T	99	58	G/T	99	77
E13082_L420	148	A/C	72	131	A/C	63	197
E736_L420	336	A/G	33	5	A/G	37	7
E277732_L419	214	C	71	14	T	78	30
E277478_L419	268	A	49	14	A/T	56	37
E256618_L419	237	C/G	99	21	C	99	39
E233790_L419	205	C/T	79	12	C	99	33
E195252_L419	298	G/T	52	11	G	78	17
E132095_L419	175	A/G	53	12	G	94	26
E132095_L419	203	G/T	44	13	G	62	24
E132095_L419	222	A/T	67	9	A	94	23
E116087_L419	228	G	74	15	A/G	99	30
E103764_L419	115	C/T	70	15	C	88	21
E90817_L419	171	C/T	99	18	C/T	99	78
E71508_L419	100	A/G	37	8	G	93	23
E71508_L419	133	G	62	11	G/T	41	19
E71508_L419	134	G	62	11	G/T	75	21
E46002_L419	102	C/G	61	11	G	96	25
E46002_L419	107	A/T	65	14	A	99	28
E44458_L419	236	G	39	20	A/G	45	36
E22337_L419	47	A/G	34	15	A/G	99	25
E22337_L419	130	A/G	99	45	A/G	99	87
E22337_L419	132	C/T	40	45	C/T	99	84
E22337_L419	164	A/G	99	26	A/G	99	39
E22337_L419	224	C/G	65	22	C/G	99	33
E22337_L419	284	A	47	13	A/T	29	11
E17519_L419	199	C	38	16	A/C	37	31
E17519_L419	214	C	47	25	C/T	25	43
E7495_L419	294	C/T	29	5	C	47	6
E332157_L418	183	A/C	38	13	C	99	29
E332157_L418	186	A/G	42	13	A	99	31
E329204_L418	103	A/C	57	7	A	65	12
E303462_L418	238	C/G	59	10	G	54	8
E249309_L418	118	G/T	49	12	G	91	22
E249309_L418	263	G	45	5	A/G	75	22
E244374_L418	103	C/T	53	10	C	59	10
E227468_L418	168	G/T	64	11	G	91	23
E227468_L418	172	C	29	11	C/T	99	26
E222393_L418	140	A/G	44	13	A	99	26
E222207_L418	269	A	50	7	A/G	35	9
E218904_L418	84	T	32	12	A/T	69	20
E211016_L418	181	C/T	97	13	T	99	36
E210213_L418	265	C/T	53	10	C/T	97	11
E203334_L418	172	T	86	20	G/T	99	26
E203334_L418	224	A/G	85	14	A/G	99	20
E199258_L418	178	C/T	65	12	T	93	24
E197822_L418	116	C/G	99	17	G	99	30
E184491_L418	192	G/T	78	15	T	99	36
E173796_L418	148	C/T	42	9	C	48	6
E173290_L418	132	C/T	67	16	C/T	48	33
E163281_L418	146	A/T	99	18	A/T	99	35
E155785_L418	180	G/T	31	19	G	99	30
E155785_L418	207	G/T	99	24	G/T	99	34
E155785_L418	223	A/G	99	28	A/G	99	28
E155785_L418	229	A/G	66	25	G	99	26
E155785_L418	251	A/G	28	11	G	71	14
E148915_L418	74	C/T	80	12	C/T	89	17
E148915_L418	96	A/G	77	13	A/G	91	19
E148915_L418	134	C/T	71	15	C/T	99	16
E144722_L418	204	C/T	65	16	C	96	23
E144722_L418	212	A/T	67	15	T	97	24
E138476_L418	193	C	82	18	A/C	99	22
E136751_L418	194	A/C	99	20	A	82	18
E112707_L418	115	A/T	40	7	A	76	17
E107171_L418	183	A/T	99	16	T	85	19
E89810_L418	243	A/G	99	19	G	97	25
E76607_L418	203	A/G	99	14	G	38	15
E74666_L418	91	A/G	29	5	A	29	11
E74666_L418	214	A/G	71	12	A	89	21
E72077_L418	96	C/G	99	15	C	58	21
E64383_L418	94	A/C	50	13	C	77	16
E64383_L418	121	T	49	18	A/T	99	17
E61601_L418	127	A/T	65	12	A/T	90	19
E53860_L418	143	A/T	99	30	A/T	99	30
E48751_L418	106	G/T	99	41	G/T	99	71
E48751_L418	163	A/C	99	117	A/C	99	119
E48751_L418	170	G/T	99	119	G/T	99	112
E48751_L418	193	A/G	99	139	A/G	99	103
E44165_L418	242	A/G	69	10	A	71	14
E32442_L418	198	T	50	22	A/T	27	55
E23601_L418	213	T	99	40	G/T	99	51
E5677_L418	200	A/G	99	18	A	59	10
E5677_L418	261	A/T	26	12	A/G	56	22
E310274_L417	135	G	53	8	A/G	99	25
E310274_L417	184	A	77	16	A/G	99	26
E310274_L417	192	G/T	85	16	T	99	26
E310274_L417	232	C/T	32	11	C	29	11
E304140_L417	263	A/G	32	7	G	45	5
E277111_L417	166	G	99	27	A/G	99	25
E222418_L417	110	A/T	25	11	A	84	19
E222418_L417	171	A	71	15	T	62	25
E212532_L417	173	A/G	43	10	G	58	11
E212532_L417	182	G	56	9	T	29	11
E200158_L417	171	A/T	42	27	A	99	46
E198539_L417	155	T	44	5	G/T	74	9
E198539_L417	183	A/G	44	10	G	32	12
E189155_L417	89	C	26	10	G	99	26
E189155_L417	170	C/T	30	11	C	80	17
E187987_L417	193	G/T	96	16	T	99	32
E167148_L417	233	A/G	36	6	A	56	9
E161006_L417	140	A/G	82	21	A	59	10
E139364_L417	148	A/G	37	10	G	73	15
E139364_L417	149	A/G	37	10	G	72	15
E119799_L417	166	A/C	55	17	C	50	26
E119143_L417	198	A/C	37	13	C	58	21
E108091_L417	243	G/T	36	7	T	77	17
E96052_L417	190	T	42	16	G/T	97	33
E95289_L417	98	C	32	19	A/C	99	70
E95289_L417	216	C	39	37	C/T	41	130
E92678_L417	135	G/T	74	14	T	99	24
E92678_L417	260	G/T	63	10	G	76	16
E74725_L417	155	A/T	74	18	A/T	99	26
E66883_L417	137	G/T	90	15	T	73	15
E43426_L417	92	G/T	32	8	T	44	5
E43426_L417	210	A/T	99	19	A	48	19
E31736_L417	154	A/C	84	10	C	82	18
E29756_L417	235	A	59	23	A/G	28	38
E29756_L417	246	A/G	69	20	G	53	29
E26745_L417	253	A/C	50	48	A	35	60
E18170_L417	124	C/T	49	7	C	59	12
E17787_L417	89	C/T	30	34	C/T	73	76
E17787_L417	95	C/T	26	51	C	84	89
E14172_L417	234	A/G	35	6	A	80	17
E8623_L417	157	A/C	27	10	A/C	51	19
E7273_L417	203	C/G	63	12	G	90	23
E326964_L416	137	C/T	52	8	T	90	21
E320465_L416	324	A/G	60	12	G	44	6
E314458_L416	272	A/C	40	6	A	56	9
E312542_L416	239	C/T	58	8	T	32	12
E312437_L416	130	G	65	13	G/T	73	17
E292244_L416	130	C/T	99	18	C	88	20
E277538_L416	173	A/G	99	13	G	82	18
E274090_L416	139	C/T	56	19	C	44	16
E265548_L416	108	A/C	48	11	A/C	99	30
E262414_L416	186	C/T	80	13	C	60	22
E228016_L416	231	C/T	70	11	C	81	19
E216566_L416	191	G	74	16	A/G	99	19
E211525_L416	257	G/T	92	11	G	65	12
E200321_L416	161	C/T	66	12	T	99	27
E180691_L416	200	A/G	99	23	G	96	24
E176148_L416	270	C/T	99	31	C/T	59	9
E172107_L416	229	A/C	78	16	A	99	30
E133006_L416	207	C/T	99	15	C	91	23
E133006_L416	239	C/T	68	10	T	59	10
E125576_L416	225	A/G	63	11	G	62	11
E92382_L416	198	T	66	13	A/T	99	23
E92382_L416	200	T	59	10	G/T	99	24
E80036_L416	99	C/T	55	11	C	89	21
E80036_L416	258	C/T	64	12	T	75	16
E76407_L416	183	A/C	99	20	A	95	25
E64457_L416	98	A/G	92	14	A	87	21
E52476_L416	172	C/T	99	13	T	70	14
E49591_L416	183	A	99	66	A/T	99	150
E49591_L416	209	C/T	60	81	C	99	190
E33973_L416	130	A	82	18	G	70	26
E19183_L416	145	C/T	99	18	T	87	21
E14484_L416	23	A/C	39	22	A	36	19
E8528_L416	120	G	99	55	C/G	44	82
E8528_L416	160	A/T	49	60	A/T	99	99
E8528_L416	173	A/G	99	54	A/G	99	98
E8528_L416	192	A/C	99	51	C	99	111
E8528_L416	280	G/T	67	8	G/T	99	17
E5529_L416	277	G	39	10	C/G	51	20
E1953_L416	76	T	38	48	A/T	41	57
E316476_L415	245	A/T	27	8	T	92	22
E306117_L415	148	A/C	60	11	C	82	19
E301965_L415	254	C/T	42	9	C	59	10
E301215_L415	214	A/G	67	10	A	93	22
E295425_L415	183	A/G	47	9	A	74	15
E293126_L415	175	A/G	99	17	G	81	33
E292647_L415	118	G	56	9	A/G	35	8
E283695_L415	82	A/T	74	11	T	50	7
E280244_L415	204	A/G	35	5	G	35	13
E279935_L415	154	A/G	43	11	G	41	15
E246397_L415	95	A/G	94	17	G	81	18
E242612_L415	156	C/T	99	14	C	82	18
E238675_L415	78	C	47	6	A/C	43	11
E215481_L415	174	G/T	56	12	G/T	65	13
E212873_L415	125	G	56	10	A/G	71	17
E211606_L415	198	C/T	85	18	C	82	32
E207555_L415	79	A/C	33	10	C	71	14
E207555_L415	235	C/T	99	19	C	88	20
E206789_L415	90	T	71	14	C	44	16
E203789_L415	122	C/T	66	15	T	32	12
E197723_L415	348	C	53	8	A	38	15
E181153_L415	242	A/C	65	13	A	79	17
E180769_L415	237	A/G	56	9	G	73	15
E179563_L415	241	A/G	60	14	G	29	11
E176411_L415	182	C/G	99	19	G	68	14
E174194_L415	79	C/T	99	14	C	59	10
E174194_L415	101	A/G	99	15	G	40	15
E173964_L415	209	C/T	47	13	T	99	25
E157570_L415	59	C/T	59	8	C/T	47	7
E157570_L415	116	C/T	77	21	C/T	27	29
E153328_L415	205	T	38	14	A/T	99	23
E153196_L415	220	A/T	37	6	T	59	10
E149727_L415	203	A/G	81	19	A	96	24
E126544_L415	126	C/G	28	10	G	42	16
E115847_L415	187	A/C	99	45	A/C	99	44
E111818_L415	222	A/G	99	14	A	92	22
E89541_L415	154	A/G	99	17	A	71	14
E87579_L415	146	A/C	39	9	C	99	25
E84438_L415	150	A	99	52	A/G	33	78
E84438_L415	203	A/G	99	73	A/G	99	93
E79424_L415	256	C/T	43	14	C	65	12
E75288_L415	121	A/C	99	21	C	86	19
E66792_L415	216	C/T	53	9	C	63	23
E61142_L415	76	C/T	61	11	T	53	8
E60864_L415	191	C/T	99	41	T	99	46
E60864_L415	241	A/T	99	29	T	99	35
E59202_L415	178	A/T	27	10	A	99	32
E49105_L415	194	C/T	74	19	C/T	99	41
E32083_L415	126	C/T	88	15	T	53	21
E21180_L415	92	C/T	99	37	C/T	99	107
E21180_L415	147	G	99	47	A/G	99	135
E21180_L415	238	G	66	22	A/G	45	57
E19919_L415	229	A/G	37	10	A/G	99	35
E19919_L415	249	A/T	54	7	A/T	99	38
E11003_L415	124	T	47	10	C/T	49	14
E4104_L415	136	G/T	94	15	T	40	15
E4104_L415	149	A/T	60	14	A	72	15
E4104_L415	246	A/G	37	13	A	99	26
E3032_L415	60	C/T	43	10	C/T	99	26
E3032_L415	267	C/T	36	39	C	45	58
E325697_L414	113	A/T	84	10	A	33	12
E311686_L414	217	G	58	10	G/T	63	9
E300337_L414	178	A/G	99	13	A	89	21
E270876_L414	120	T	38	14	G/T	49	15
E270876_L414	133	T	38	18	A/T	45	18
E266952_L414	162	A/G	34	8	G	83	19
E258438_L414	144	A/C	99	19	A/C	99	42
E258438_L414	194	A/G	33	20	A/G	99	50
E258438_L414	250	A	28	9	A/G	51	19
E254517_L414	252	C/T	99	14	T	68	13
E251874_L414	187	A/G	87	18	G	92	22
E232100_L414	190	A/G	99	13	G	40	15
E232100_L414	191	A	68	13	A/G	99	16
E229020_L414	172	A/T	99	21	A	45	17
E221459_L414	99	A	76	16	A/T	64	12
E221459_L414	113	C	68	13	C/T	99	19
E221459_L414	172	G	73	15	A/G	99	27
E210502_L414	205	A/G	30	11	G	94	24
E206541_L414	201	A/G	99	17	G	95	25
E205668_L414	202	A/T	99	22	T	99	38
E167908_L414	396	C/G	31	29	G	42	73
E160829_L414	276	A/G	69	13	A	62	23
E129667_L414	132	A/G	87	21	G	92	22
E102979_L414	259	A/G	59	10	A/G	41	10
E99967_L414	232	A/G	99	21	A	73	16
E98672_L414	246	C/T	92	12	T	46	18
E91554_L414	124	A	53	8	A/G	74	12
E85856_L414	185	A/T	99	19	T	87	20
E85856_L414	188	A/C	87	19	C	88	21
E70719_L414	252	A/G	50	13	G	58	10
E68094_L414	160	A/G	62	9	A	85	19
E63229_L414	137	C/T	99	14	C	99	33
E63229_L414	171	C/T	99	14	T	99	37
E62508_L414	38	C/T	47	12	T	58	23
E62508_L414	62	T	31	27	G/T	99	59
E62508_L414	95	C/T	44	67	C/T	99	113
E62508_L414	109	A/T	99	94	A/T	99	183
E62508_L414	228	C/G	99	74	C/G	99	130
E60332_L414	164	C/T	99	23	T	69	28
E60332_L414	177	A/T	99	26	T	99	35
E57260_L414	175	C/G	72	15	G	81	18
E54195_L414	143	C	42	17	C/T	86	54
E54195_L414	181	A/G	77	35	A/G	99	94
E54195_L414	245	A/G	99	29	A/G	88	81
E54195_L414	262	C/G	99	20	C/G	99	63
E54195_L414	289	C	50	8	A/C	45	17
E53009_L414	198	A/G	99	22	A	88	20
E39581_L414	252	A/T	84	10	T	86	20
E39581_L414	257	A/G	43	9	G	78	17
E36284_L414	212	C/T	45	10	C	35	13
E36284_L414	214	A/C	42	10	A	35	13
E19694_L414	184	C/T	30	23	C/T	99	33
E9289_L414	191	A/G	26	55	A/G	82	102
E3640_L414	101	A/T	67	12	T	95	23
E300038_L413	113	A/T	42	5	T	53	8
E300038_L413	185	A/G	25	8	A	47	7
E222998_L413	167	A	26	8	G	25	10
E211040_L413	76	G	42	9	A/G	40	9
E211040_L413	78	G	42	9	A/G	46	9
E204855_L413	103	G	47	6	A/G	38	13
E204855_L413	213	G/T	69	10	T	77	16
E204855_L413	221	G/T	77	9	T	76	16
E191329_L413	153	A/C	66	14	C	80	17
E184474_L413	128	G/T	81	12	G	67	13
E184474_L413	130	A/G	99	12	G	66	13
E182123_L413	91	G/T	57	9	T	77	16
E182123_L413	256	C/T	34	8	C	77	17
E181553_L413	214	A/G	99	16	A	74	15
E174993_L413	240	C/T	99	20	C	80	17
E172086_L413	187	A/C	57	14	C	72	20
E161652_L413	124	A/G	99	16	A	77	16
E161652_L413	158	C/T	36	13	T	90	21
E161652_L413	275	A/T	83	9	T	44	5
E161517_L413	100	A/T	53	37	A/T	99	45
E161517_L413	116	C/G	65	37	C/G	99	41
E141301_L413	75	A/T	74	9	A	82	18
E125248_L413	189	G	47	6	A/G	99	19
E117313_L413	161	C/T	90	17	T	80	19
E117313_L413	202	A/T	88	17	A	81	18
E102516_L413	206	C/T	99	17	T	58	22
E102516_L413	325	T	53	8	C/T	99	25
E95857_L413	127	A/G	99	26	G	75	16
E95333_L413	240	C/T	69	10	T	59	10
E95333_L413	245	A/T	36	5	T	56	9
E91471_L413	261	T	56	9	C/T	99	61
E91471_L413	267	G	32	10	C/G	99	65
E91471_L413	276	A/T	31	6	A/T	99	62
E89600_L413	77	C/G	87	9	G	56	9
E89600_L413	194	C/T	99	26	T	56	9
E84946_L413	40	A/C	48	53	A/C	77	119
E84946_L413	249	C	31	42	C/T	30	76
E84946_L413	283	A	57	38	A/G	80	58
E84946_L413	293	A/G	54	35	A/G	99	57
E59060_L413	172	A/G	99	18	A	99	31
E54857_L413	207	C/T	93	20	C	99	31
E54320_L413	134	A/T	76	13	A/T	99	21
E54320_L413	182	G/T	56	11	G	57	22
E49271_L413	207	A/G	48	10	G	65	12
E46353_L413	142	A/T	99	18	A	57	21
E46353_L413	161	A/C	99	16	A	99	24
E45456_L413	144	A/T	30	10	A	49	18
E45456_L413	198	C/G	31	5	G	29	11
E44426_L413	209	G/T	99	17	G	99	36
E43380_L413	194	G	74	15	C	43	17
E34097_L413	144	A/G	42	10	A/G	99	35
E34097_L413	202	C/T	25	8	C	41	15
E27111_L413	161	A/G	86	26	G	56	22
E313603_L412	91	C/T	47	9	T	73	15
E283322_L412	88	A/T	67	8	A/T	59	10
E283322_L412	119	C/G	69	9	G	73	15
E276127_L412	144	G/T	99	27	G	67	26
E248223_L412	215	A/C	73	12	C	50	18
E242984_L412	122	A/G	42	11	A	68	13
E242101_L412	224	A/T	94	17	A	85	19
E240487_L412	103	A/C	39	7	C	68	13
E240487_L412	211	A/C	59	8	C	86	19
E240215_L412	137	G/T	47	11	T	38	9
E240215_L412	160	G/T	81	14	G	56	14
E240215_L412	236	A/G	80	19	G	62	11
E238500_L412	187	C/T	34	14	C/T	39	26
E213514_L412	220	A/G	88	20	G	66	24
E192701_L412	116	A/G	80	26	G	52	32
E192603_L412	141	C/T	99	14	C	74	15
E192603_L412	154	G/T	99	17	T	76	16
E185318_L412	232	G/T	50	9	T	70	14
E179723_L412	227	C/T	60	39	T	38	24
E179723_L412	281	A/C	60	16	C	39	6
E163646_L412	256	A/C	52	8	A	50	8
E163646_L412	258	C/G	67	8	C	50	8
E157927_L412	68	C	36	8	C/T	36	21
E157927_L412	129	G/T	37	10	G	38	15
E156695_L412	111	G/T	80	13	T	79	17
E146969_L412	252	T	26	10	C	73	15
E146969_L412	262	A/G	36	9	G	62	11
E146969_L412	267	C/T	60	9	T	59	10
E136014_L412	178	G/T	25	12	G/T	50	25
E133427_L412	99	G/T	66	13	T	41	16
E133427_L412	135	C/T	99	16	C	51	19
E133427_L412	271	A/G	25	7	A	50	7
E104439_L412	135	C/T	36	15	T	76	16
E96305_L412	218	A/G	38	12	G	62	23
E94028_L412	206	A/T	76	14	T	62	14
E85756_L412	139	C	97	23	C/T	99	41
E85756_L412	191	A/G	99	25	A	99	40
E78980_L412	193	G/T	88	16	G	99	32
E78490_L412	200	G	56	9	C/G	99	18
E78243_L412	201	A/T	30	28	A/T	99	65
E75764_L412	188	C/T	99	22	T	99	29
E58948_L412	204	G	79	17	A/G	99	15
E57855_L412	156	C/T	99	45	C/T	99	83
E50611_L412	159	G/T	99	21	T	71	27
E44170_L412	242	A/C	88	16	A	95	23
E40010_L412	107	A/T	99	27	A/T	88	75
E40010_L412	114	C/G	36	33	C/G	68	75
E33139_L412	97	A/G	51	14	G	83	19
E32904_L412	232	A/C	35	12	C	95	23
E25995_L412	123	A/G	39	6	G	84	21
E25995_L412	205	C	68	13	C/T	99	26
E25589_L412	186	A/T	99	14	T	74	16
E22907_L412	170	A/C	60	15	A	99	28
E22907_L412	200	A/T	41	12	A	78	29
E22045_L412	38	C	39	9	C/G	88	28
E22045_L412	78	G	44	31	A/G	99	65
E22045_L412	106	A/T	31	57	A/T	41	90
E20518_L412	130	A/C	65	16	A	50	30
E20518_L412	131	C/T	54	16	C	30	33
E8929_L412	194	C	56	9	C/T	82	11
E7452_L412	97	C	64	13	C/T	33	32
E7452_L412	114	A/G	65	18	A/G	72	48
E7452_L412	163	C/G	58	25	C	84	47
E3506_L412	62	C	47	6	T	34	13
E319061_L411	134	A/G	99	23	A	90	22
E308086_L411	206	T	59	10	G/T	99	14
E298222_L411	80	A/G	99	19	A	52	19
E272958_L411	150	C/T	30	12	C	71	14
E252155_L411	256	T	56	9	C/T	92	11
E251782_L411	168	C/T	99	14	C	99	29
E251782_L411	177	A/G	99	14	G	99	26
E236160_L411	162	C/T	46	10	C	96	23
E223050_L411	133	C/T	99	19	T	87	20
E211544_L411	184	C/T	71	15	T	99	28
E209589_L411	191	G	35	13	C/G	99	23
E209309_L411	211	A/G	93	13	G	51	20
E209288_L411	206	G/T	42	7	G/T	99	23
E202385_L411	141	A/G	65	9	G	81	19
E202385_L411	218	T	44	16	C/T	38	28
E192764_L411	229	A/C	85	11	A	73	16
E181388_L411	235	C/G	84	11	G	32	12
E172058_L411	136	A/T	56	16	T	99	28
E171986_L411	169	A/G	46	11	G	62	23
E158341_L411	140	A/G	73	13	G	93	24
E155968_L411	156	A/C	45	12	A	98	27
E144454_L411	183	A	83	31	C	99	84
E144454_L411	216	C/T	26	29	C/T	95	80
E141523_L411	162	G/T	79	13	T	92	22
E131563_L411	87	G/T	42	7	G	62	11
E118283_L411	133	G/T	36	5	G/T	99	17
E118283_L411	140	C/T	30	7	C/T	86	24
E118283_L411	176	G	25	19	A/G	99	66
E110873_L411	141	A/G	84	11	G	88	21
E86026_L411	268	A/C	27	7	C	53	8
E74122_L411	145	G/T	61	11	G	53	20
E64866_L411	142	A/G	99	18	G	63	12
E61988_L411	90	A/G	67	38	A/G	99	49
E61988_L411	102	A/T	99	46	A/T	99	62
E61988_L411	175	T	93	24	C/T	34	40
E51379_L411	93	C/T	99	41	T	99	35
E51379_L411	103	C	71	47	A/T	45	38
E51379_L411	133	C/G	99	97	C/G	99	173
E51379_L411	316	C	39	23	T	32	40
E51379_L411	339	T	36	20	A	29	41
E34201_L411	160	G/T	64	123	C/T	41	174
E34201_L411	247	A/G	99	78	G	79	125
E32305_L411	161	A/T	84	13	T	59	21
E32305_L411	229	C/G	46	22	C	99	31
E26025_L411	230	A/G	35	10	A	68	13
E17770_L411	180	A/T	80	23	A/T	99	46
E14134_L411	91	G	44	8	A/G	31	9
E14134_L411	123	C/T	56	8	C	74	15
E13173_L411	72	A/T	99	47	A/T	99	85
E13173_L411	107	C/T	99	34	C/T	99	67
E13173_L411	109	C/T	99	32	C/T	99	67
E1796_L411	204	G	34	13	A	99	31
E293933_L410	225	C/T	29	12	T	43	16
E290220_L410	161	C/G	47	5	C	99	32
E290220_L410	219	T	53	8	G/T	99	29
E284750_L410	262	C/T	34	10	C	48	6
E282552_L410	105	A/G	99	16	G	56	21
E250415_L410	161	C/T	50	17	C	67	13
E242930_L410	107	G/T	42	6	G	53	8
E235734_L410	110	A/G	40	12	G	95	24
E227968_L410	238	A/T	87	14	A	93	22
E227390_L410	101	A/C	99	15	C	73	15
E221829_L410	133	T	26	10	C	80	17
E216844_L410	218	A/T	30	7	T	81	18
E215405_L410	122	A	74	15	A/T	60	12
E215405_L410	164	A/T	91	16	T	79	17
E213765_L410	146	A/C	31	11	A	77	17
E203041_L410	59	A/C	29	7	A	59	10
E201998_L410	96	C/T	71	17	T	90	21
E201998_L410	110	A/T	99	19	T	99	29
E200551_L410	67	G	45	5	A/G	71	12
E199133_L410	157	C/T	99	27	C	59	22
E192740_L410	120	C/T	99	14	C	68	13
E191492_L410	178	T	39	46	C/T	37	77
E191492_L410	256	A/T	93	17	A/T	37	39
E189341_L410	141	C/T	27	12	C	99	30
E185665_L410	229	A/T	99	17	A	63	24
E185665_L410	238	C/T	90	14	C	94	23
E180862_L410	270	A/G	25	6	G	76	16
E180558_L410	195	A/G	99	16	G	90	21
E176224_L410	198	C/T	99	21	T	99	26
E162943_L410	229	A/G	71	11	A	76	16
E153994_L410	97	A/G	34	7	G	74	15
E153994_L410	98	A/G	40	8	A	74	15
E147266_L410	205	A/C	94	12	A	99	31
E136959_L410	242	A/G	50	7	G	86	19
E136940_L410	243	G/T	34	11	G	59	11
E122244_L410	220	A/C	36	13	C	49	18
E109278_L410	211	C/T	74	12	T	98	24
E109278_L410	243	A/C	33	8	C	40	15
E86410_L410	164	A/G	31	18	A	89	21
E78467_L410	74	C/T	37	15	C/T	99	57
E78467_L410	169	A/C	28	24	A/C	99	85
E78467_L410	263	C	38	28	C/G	25	52
E70084_L410	180	A/G	79	25	A/G	88	52
E69427_L410	122	G/T	34	8	T	90	21
E69427_L410	232	A/G	99	15	G	95	23
E69427_L410	250	A/G	62	8	G	88	21
E65694_L410	203	A/G	99	16	G	73	15
E65694_L410	237	C/T	71	12	C	68	13
E62540_L410	182	A/G	70	59	A	86	65
E62540_L410	221	A/G	63	57	A	60	56
E57463_L410	155	C/T	73	19	T	85	19
E56246_L410	164	G/T	99	23	G	99	31
E56080_L410	189	C/T	43	10	T	87	20
E56080_L410	211	C/T	72	11	T	71	14
E53878_L410	172	A/G	42	20	G	92	23
E53878_L410	218	C/G	39	8	C	55	20
E51857_L410	229	T	56	11	G/T	94	15
E48303_L410	179	C/T	38	13	T	99	39
E44384_L410	78	C/T	52	18	C/T	97	32
E44384_L410	170	C/G	99	73	C/G	99	115
E44384_L410	265	A/C	99	21	A	99	27
E42963_L410	67	C/T	86	13	C	56	9
E36669_L410	274	A/G	58	8	A	47	6
E27065_L410	68	G/T	29	9	G	45	11
E27065_L410	172	A/C	99	19	A/C	62	21
E24647_L410	86	A/G	79	10	G	44	5
E24647_L410	88	C/T	66	10	T	44	5
E24647_L410	229	C/T	99	15	T	62	23
E14244_L410	174	A/G	37	17	G	67	14
E10678_L410	108	A/G	70	10	A/G	99	13
E10678_L410	154	A/T	79	12	A	32	12
E1297_L410	191	A	44	16	G	99	31
E317176_L409	207	G/T	31	5	T	78	17
E279671_L409	214	A/G	32	20	A	29	11
E267012_L409	57	T	44	5	A/T	61	8
E267012_L409	158	A	68	13	A/C	91	15
E262231_L409	273	C	59	36	C/T	54	39
E262231_L409	334	A/T	28	18	A	64	15
E251933_L409	201	A/C	99	21	C	98	40
E230569_L409	161	A/G	60	10	G	92	23
E228282_L409	80	A/G	80	19	G	92	22
E223627_L409	127	A	47	7	A/C	25	5
E223254_L409	185	C	45	5	C/G	99	29
E219569_L409	156	A	65	12	A/G	89	16
E218752_L409	196	T	26	10	C/T	55	12
E216137_L409	251	C/T	77	10	C	62	12
E215585_L409	232	C/T	99	13	C	46	17
E199910_L409	168	C/T	99	19	C	99	30
E195378_L409	62	A/G	29	5	G	70	14
E187635_L409	137	G/T	51	15	G	93	22
E187635_L409	149	A/G	61	17	A	96	23
E177059_L409	177	C/T	48	13	C/T	99	31
E177059_L409	181	C/T	57	13	C/T	99	31
E177059_L409	204	A/T	62	16	T	99	31
E175715_L409	116	A/G	80	15	A	99	27
E160635_L409	129	A/G	89	12	G	95	26
E159257_L409	91	C/T	99	13	C	89	20
E150710_L409	221	C	76	17	A	49	18
E150710_L409	229	A	43	16	C	73	15
E148512_L409	201	A/T	80	14	T	99	33
E147532_L409	192	C/G	34	9	C	90	22
E146457_L409	228	C/T	34	32	C	72	52
E146144_L409	218	C	56	9	T	29	11
E146144_L409	231	A/C	35	7	C	29	11
E142024_L409	128	G	56	9	G/T	70	9
E137817_L409	108	G/T	94	16	G	75	16
E137817_L409	127	A/G	89	15	A	41	15
E132221_L409	97	A/G	94	13	G	75	16
E132221_L409	241	A/G	60	14	G	47	17
E127318_L409	201	C/T	99	22	C	95	23
E118663_L409	183	A/C	99	17	A	92	22
E118663_L409	224	C/T	73	13	C	71	14
E113001_L409	235	A/T	56	8	T	68	13
E112698_L409	185	A/T	88	15	T	99	39
E107870_L409	276	A/G	31	8	A	64	12
E103814_L409	179	T	50	7	C/T	94	16
E102380_L409	178	A/T	25	7	A	94	24
E101682_L409	80	A/T	29	11	A/T	53	10
E100971_L409	177	A	82	18	A/T	99	28
E100406_L409	200	A/T	38	12	T	91	21
E94710_L409	112	A/C	62	10	C	76	16
E91721_L409	234	G/T	85	12	T	99	29
E81572_L409	21	G/T	78	17	G/T	99	53
E81572_L409	30	A/T	26	36	A/T	99	79
E78762_L409	117	A/G	42	16	G	90	22
E78762_L409	174	A/G	99	18	G	63	23
E78762_L409	215	A/G	47	10	A	88	20
E70343_L409	85	G/T	31	11	G	62	11
E70343_L409	95	A/C	95	12	C	29	11
E64332_L409	121	C/T	54	9	C	90	22
E63715_L409	74	T	71	14	C/T	99	26
E63715_L409	215	C/T	76	11	C	99	27
E60507_L409	134	C/T	99	17	C	82	18
E60507_L409	169	A/C	99	22	C	97	25
E60507_L409	219	A/G	38	11	G	70	14
E54995_L409	113	C/T	95	13	C	52	19
E53940_L409	222	A/C	99	19	C	55	20
E53457_L409	210	A/T	99	15	A	71	26
E51148_L409	80	A/G	42	16	G	68	13
E48321_L409	106	C/G	99	63	C/G	99	33
E48321_L409	160	A/G	99	67	A/G	99	21
E44940_L409	187	A/C	39	11	A	35	13
E44940_L409	219	C/G	99	15	G	71	14
E44246_L409	149	A/T	68	16	T	99	33
E42447_L409	157	A/G	99	20	A	94	24
E42447_L409	166	A/C	99	19	C	94	24
E42447_L409	216	A/G	81	13	G	86	21
E38548_L409	110	A/C	30	24	C	50	36
E38548_L409	199	C	38	43	C/T	99	72
E10893_L409	107	A/G	50	31	A	99	71
E10893_L409	164	A/C	99	48	A/C	99	91
E9618_L409	225	A/T	99	30	T	76	43
E6552_L409	142	G	35	116	A/G	99	176
E6552_L409	160	C	43	96	C/T	25	158
E6552_L409	162	G/T	95	93	G/T	99	160
E5432_L409	247	T	36	5	C/T	32	11
E4175_L409	179	C/T	99	28	C/T	56	21
E2444_L409	288	T	38	7	G/T	35	10
E300565_L408	248	A	44	5	A/T	30	6
E276473_L408	142	A/T	99	18	T	79	17
E276473_L408	210	A/G	98	15	A	73	26
E276473_L408	233	A/G	76	10	A	88	21
E275510_L408	218	C/T	26	6	T	44	5
E267179_L408	61	C/T	25	10	T	58	11
E267179_L408	217	A/C	99	15	C	72	28
E267179_L408	233	A/G	73	10	A	99	26
E266617_L408	214	A/C	99	23	C	89	27
E261724_L408	164	A/T	52	9	T	61	22
E253150_L408	181	C	68	13	C/T	99	31
E252404_L408	185	A/G	99	16	A	41	15
E252404_L408	262	A/T	41	5	T	50	7
E248163_L408	97	G/T	52	8	T	80	17
E248163_L408	128	G/T	87	12	T	91	24
E234196_L408	130	A/C	99	19	C	52	19
E234196_L408	182	A/T	55	16	A	99	37
E229705_L408	163	C/G	67	19	G	93	23
E215761_L408	175	G/T	74	16	T	99	30
E213209_L408	169	A/T	99	17	T	74	15
E212891_L408	130	A/G	48	12	G	86	20
E212891_L408	221	C/T	47	10	T	80	17
E207051_L408	202	G	38	14	A	99	26
E182515_L408	187	A/T	99	21	T	99	37
E178582_L408	81	T	47	6	A/T	76	10
E165467_L408	63	A/G	78	10	A	56	9
E165467_L408	194	G	99	29	A/G	99	27
E165467_L408	210	A/G	99	23	A	61	22
E158508_L408	115	A/G	48	9	A	69	14
E157512_L408	60	A/C	80	10	A	47	6
E157512_L408	141	G/T	99	19	G	38	14
E147754_L408	192	A/C	81	11	A	74	15
E132120_L408	83	A/G	63	10	G	59	10
E128954_L408	104	G/T	99	13	T	65	12
E127398_L408	82	A/G	57	10	G	96	26
E126156_L408	179	A/T	26	8	A	99	42
E125408_L408	222	A/C	99	25	C	85	19
E114928_L408	143	A	90	21	A/G	99	49
E104775_L408	186	A/T	30	8	T	84	19
E102055_L408	122	C/G	34	13	C	81	18
E99864_L408	218	G/T	85	14	G	59	24
E97158_L408	219	C	77	16	A/C	99	51
E96458_L408	123	A/G	86	17	G	73	15
E91481_L408	44	A/T	39	7	A	67	13
E91481_L408	45	A/T	39	7	A	67	13
E89441_L408	82	A/C	47	8	A	32	12
E84324_L408	241	C/T	63	18	C	99	26
E84324_L408	256	A/G	73	16	G	94	23
E82281_L408	165	C/T	69	16	C	99	35
E82281_L408	236	A/C	90	13	C	99	33
E82112_L408	146	C	59	10	C/G	99	22
E69013_L408	237	A/G	99	42	A/G	99	35
E68171_L408	219	A/T	99	14	A/T	99	26
E62913_L408	163	A/G	99	32	A/G	99	47
E62913_L408	174	A/G	99	28	A/G	99	36
E62913_L408	186	A	37	22	A/T	99	29
E60705_L408	161	T	90	21	C/T	99	34
E60705_L408	257	A	36	12	A/T	90	12
E60405_L408	58	C/G	43	6	G	53	8
E60405_L408	214	C/T	87	18	C	77	16
E56047_L408	156	C/T	99	18	C	99	30
E44256_L408	227	T	48	30	G/T	81	64
E42277_L408	197	A/C	95	14	C	82	18
E23598_L408	83	C/G	99	15	G	68	15
E23598_L408	215	C/G	46	35	C/G	85	67
E23598_L408	221	T	48	26	A/T	25	61
E14948_L408	214	A/G	68	11	A	76	16
E9921_L408	145	A/G	79	18	G	35	13
E323299_L407	133	A/G	27	7	A	65	12
E294865_L407	229	C/T	99	14	T	77	32
E291979_L407	139	A/G	82	13	G	79	17
E289041_L407	156	C	65	12	C/T	81	14
E288225_L407	86	A/G	54	8	A/G	90	13
E288225_L407	120	A/T	33	9	A/T	90	15
E280843_L407	92	A/T	99	13	T	84	19
E274499_L407	189	A/G	99	17	G	99	30
E274406_L407	191	A/T	78	12	A	63	23
E274406_L407	192	A/T	70	12	T	63	23
E258335_L407	81	G	67	13	G/T	33	11
E254375_L407	174	A/T	69	23	T	89	56
E254375_L407	175	G/T	30	23	G	89	56
E251410_L407	157	C/T	30	12	C	99	28
E232746_L407	188	A/G	89	11	G	99	27
E229237_L407	234	C/T	44	8	C	99	29
E229237_L407	235	C/T	64	8	T	99	29
E223852_L407	153	C/T	76	11	C	90	21
E223852_L407	158	C/T	90	14	C	92	22
E222651_L407	79	C/T	59	10	C/T	47	21
E222651_L407	252	A/G	29	6	G	38	14
E217882_L407	74	C	54	8	C/T	57	11
E217882_L407	117	A/G	99	20	G	99	32
E217882_L407	122	C/T	99	21	T	99	34
E212645_L407	121	C/T	62	14	C	99	26
E212645_L407	167	A/G	99	16	G	90	23
E212645_L407	226	C/T	82	10	T	71	14
E206423_L407	125	A/G	59	15	G	85	19
E176695_L407	175	G/T	47	10	T	48	19
E173075_L407	83	A/G	25	7	G	76	16
E170275_L407	198	C/G	79	14	G	75	29
E170275_L407	234	A/C	42	7	A	92	22
E169309_L407	173	G/T	97	16	T	99	27
E149974_L407	195	G/T	99	14	T	90	21
E141744_L407	233	C/T	41	13	T	29	11
E141644_L407	223	T	31	16	G/T	85	26
E133555_L407	158	T	67	24	C/T	51	41
E133555_L407	183	A/T	99	24	A/T	99	48
E133555_L407	195	A/T	79	27	A	99	51
E133555_L407	224	C/G	99	20	C	99	36
E133555_L407	225	C/G	99	20	C	88	35
E132839_L407	154	C	73	16	C/T	65	24
E124159_L407	193	A/G	72	11	A	49	18
E122525_L407	242	C/T	40	10	T	68	13
E118393_L407	225	A/T	42	6	A	92	22
E112723_L407	223	T	68	17	C/T	99	22
E112723_L407	231	T	59	14	C/T	99	17
E110160_L407	182	C/G	99	24	G	64	24
E107457_L407	254	A/C	51	11	A	99	29
E99091_L407	165	C/G	56	10	G	66	24
E95786_L407	164	A/C	89	12	A	44	16
E94639_L407	179	C/T	99	30	C	99	39
E88887_L407	197	G/T	99	28	G	99	31
E85314_L407	246	C/T	36	6	T	65	12
E72287_L407	140	A/G	72	12	A	99	35
E39972_L407	172	A/G	97	20	A/G	99	37
E39972_L407	185	A	40	24	A/G	99	47
E39972_L407	209	A/G	25	24	A/G	99	47
E38592_L407	137	T	32	16	C/T	32	24
E38592_L407	234	A/G	37	19	G	98	24
E23479_L407	176	A/T	99	17	T	99	26
E22182_L407	149	A/C	99	34	C	67	52
E20686_L407	138	A/G	99	27	A/G	99	46
E20686_L407	168	A/T	31	37	A/T	49	52
E20686_L407	205	A/G	61	30	A/G	99	45
E20686_L407	207	A/G	29	30	A/G	73	43
E20686_L407	232	G	34	14	C/G	80	22
E20449_L407	173	C/T	32	18	C	99	40
E9693_L407	93	A/G	40	10	A	41	15
E9693_L407	182	A/C	61	20	C	99	26
E8375_L407	55	G	59	10	A/G	29	7
E322415_L406	254	A/C	67	10	C	37	12
E321848_L406	107	G	50	7	C/G	99	26
E308031_L406	214	C	59	11	C/T	99	22
E299829_L406	200	C/G	57	11	C/G	99	17
E299288_L406	133	A/T	61	10	T	47	10
E299288_L406	135	A/T	44	10	A	47	10
E297369_L406	208	C	50	18	A/C	99	29
E292521_L406	213	A/G	99	21	G	84	19
E282579_L406	76	A	47	6	A/T	26	9
E282013_L406	95	G/T	51	12	G	82	18
E278932_L406	168	A/G	66	13	A	99	29
E278932_L406	176	A/G	41	12	G	70	26
E278932_L406	249	G/T	75	15	T	41	15
E271451_L406	108	A/G	54	11	G	72	28
E271451_L406	114	G/T	51	10	G	99	28
E268983_L406	158	A/G	26	13	A	50	18
E268983_L406	242	A/T	99	14	T	70	14
E253468_L406	243	C/T	82	12	T	73	15
E242877_L406	225	A/T	89	13	A	44	16
E231632_L406	133	C/T	49	11	C	59	23
E231632_L406	171	T	31	12	G/T	99	29
E226670_L406	262	C	50	7	A/C	32	6
E224101_L406	198	A/G	44	9	G	96	27
E216295_L406	203	C/T	99	17	C	99	33
E191920_L406	176	A/C	99	16	A	90	23
E189302_L406	215	C/T	45	12	C	53	8
E188820_L406	165	A/C	58	10	C	99	33
E181917_L406	128	A/G	34	11	G	56	9
E181917_L406	158	A/G	56	9	A	53	8
E181917_L406	182	A/G	27	8	G	26	10
E171571_L406	193	A/G	52	14	A	99	26
E167475_L406	85	G/T	87	13	G/T	60	10
E149290_L406	119	C/T	38	8	C	65	12
E146516_L406	87	T	99	82	G/T	83	139
E146516_L406	191	A	62	48	A/G	53	53
E124529_L406	84	A/G	43	7	G	93	24
E124529_L406	108	C/T	39	9	C	93	24
E122323_L406	158	C/T	69	13	T	44	16
E119913_L406	190	A/G	47	15	G	88	20
E117727_L406	126	A	40	15	T	98	24
E115790_L406	187	C	85	19	C/G	99	15
E115790_L406	240	G/T	56	11	T	61	11
E113045_L406	150	C/T	99	16	T	99	25
E112862_L406	155	A/G	34	14	A	96	24
E106512_L406	175	A/G	94	16	G	62	23
E103361_L406	104	G	33	8	A/G	81	31
E103361_L406	184	A/C	81	35	A/C	89	40
E102155_L406	137	G/T	99	23	G/T	99	20
E95925_L406	171	A/G	69	12	A	32	12
E93254_L406	187	C/T	56	16	T	83	18
E93254_L406	218	A/G	51	16	G	35	13
E85920_L406	184	A/G	99	20	A	99	42
E85242_L406	217	A	56	9	A/C	99	20
E84784_L406	75	A/T	32	11	T	47	19
E78604_L406	211	C/T	97	16	C	98	24
E76316_L406	123	G/T	56	11	T	75	28
E76316_L406	130	C/T	55	12	T	81	31
E73408_L406	107	C/G	99	15	C/G	99	32
E73408_L406	115	C/T	72	13	C/T	99	31
E73408_L406	165	C/T	76	18	C/T	58	31
E72640_L406	351	A/T	25	7	A	39	6
E70945_L406	212	T	28	11	G/T	99	14
E70940_L406	162	A/G	83	12	G	99	26
E69772_L406	164	A/T	99	24	A	46	17
E67822_L406	153	A/T	99	28	T	98	28
E67538_L406	215	A/T	35	7	T	99	25
E54253_L406	162	A/G	99	23	A	99	33
E51235_L406	247	G	64	37	A/G	45	31
E51235_L406	281	A/G	81	42	A/G	99	43
E48207_L406	237	G/T	99	27	G	82	18
E42355_L406	192	C	51	7	C/T	99	34
E38706_L406	115	A/G	61	10	A	94	23
E38706_L406	122	C/G	94	14	C	90	21
E34888_L406	215	C/T	77	19	T	76	28
E34025_L406	189	A/G	67	10	A	56	9
E30566_L406	128	A/C	37	24	A	35	56
E30566_L406	270	C/T	34	15	C/T	99	31
E30566_L406	281	A	29	14	A/C	26	27
E27041_L406	133	A/G	70	11	G	98	25
E18069_L406	193	A/G	97	18	A/G	99	22
E18069_L406	234	A/G	36	10	G	72	15
E8460_L406	237	C/T	34	22	C/T	99	31
E6544_L406	38	C/G	79	42	C/G	99	52
E6544_L406	61	C/G	99	84	C/G	99	106
E6544_L406	73	A/C	34	113	A/C	83	134
E298466_L405	194	A/C	99	14	C	99	35
E295955_L405	172	A/G	99	28	G	99	32
E295955_L405	178	C/T	99	26	T	99	31
E295249_L405	167	A/T	41	12	A	77	17
E295231_L405	86	G/T	35	10	G	85	19
E284857_L405	118	C/T	99	16	C	87	20
E284375_L405	240	C/T	53	9	T	59	10
E258914_L405	207	C/G	49	11	C	99	28
E250662_L405	136	A/T	77	14	T	88	21
E250662_L405	191	C/T	94	15	T	37	14
E250173_L405	110	G	56	9	A/G	99	20
E249887_L405	159	A/T	99	26	A	86	34
E242936_L405	185	A/G	76	15	G	99	32
E242936_L405	196	G/T	99	16	T	99	29
E234740_L405	155	C/T	99	17	T	85	19
E234740_L405	170	A/G	93	16	G	85	19
E233339_L405	103	G/T	45	6	G/T	99	18
E233339_L405	151	A/G	59	11	A/G	99	18
E229200_L405	86	T	50	7	C	41	15
E219535_L405	65	A/G	80	15	A	52	20
E219318_L405	144	C/T	30	17	C	77	29
E219318_L405	272	A/G	55	7	A	45	5
E217026_L405	233	A/G	66	8	G	59	10
E212743_L405	229	A/T	99	16	T	99	29
E210017_L405	116	T	77	16	C	38	14
E209540_L405	236	A/T	33	7	A	84	19
E209540_L405	243	A/G	32	6	G	49	18
E205000_L405	141	A/G	61	12	A	56	9
E194161_L405	132	G/T	30	13	G	57	22
E192429_L405	244	T	53	8	C/T	99	22
E182757_L405	205	C/T	45	7	C/T	99	29
E159367_L405	129	A/C	99	18	A/C	99	23
E145328_L405	115	C/T	85	13	C/T	84	10
E145328_L405	143	A/G	62	10	G	92	23
E145328_L405	200	A/C	51	16	A	99	30
E141535_L405	100	A/G	79	9	A	62	11
E141535_L405	145	A/T	99	22	T	99	26
E141535_L405	212	A/T	99	16	A	85	19
E141535_L405	218	A/T	55	13	T	43	17
E136277_L405	205	A/C	99	13	C	99	28
E136277_L405	253	A/T	33	6	T	38	16
E135711_L405	257	C/T	36	8	C/T	44	7
E131689_L405	65	A/G	56	8	G	74	16
E127239_L405	147	A/G	99	22	G	97	26
E126929_L405	137	A/G	52	14	G	71	14
E126929_L405	203	C/T	73	14	C	99	26
E123760_L405	62	C/T	59	8	C	62	11
E123514_L405	272	C/T	41	10	C	56	9
E123355_L405	249	A/G	99	15	A	53	9
E121898_L405	93	A/T	32	17	A	59	24
E120342_L405	94	A/T	26	9	A	59	10
E116999_L405	129	A/G	25	10	G	89	25
E109692_L405	177	C/T	99	16	T	99	38
E100674_L405	87	A/T	99	14	A	82	19
E91549_L405	150	G/T	43	7	T	84	20
E91549_L405	152	A/G	29	7	G	84	20
E88971_L405	158	C/T	46	7	C	96	24
E72860_L405	222	A/C	58	14	A/C	46	11
E69576_L405	139	A/G	99	27	G	99	31
E69009_L405	174	C	68	13	C/G	99	27
E63296_L405	154	A/G	25	9	G	99	45
E63296_L405	183	C/G	99	15	C/G	99	44
E63296_L405	227	C/T	57	13	C/T	99	36
E63296_L405	246	G/T	66	8	G/T	99	24
E63296_L405	249	A/G	46	8	A/G	99	23
E51764_L405	113	A/G	37	10	G	84	21
E42182_L405	199	C	29	11	C/T	99	40
E33504_L405	175	C/T	54	7	T	70	15
E31820_L405	137	C/T	64	15	C	79	29
E31820_L405	148	A/G	27	15	G	91	35
E31405_L405	149	G/T	49	11	G	68	13
E27998_L405	224	A	59	18	A/G	99	31
E5495_L405	159	A/T	74	10	T	85	32
E2993_L405	190	A/G	50	15	G	88	20
E2993_L405	247	C/G	33	10	G	56	9
E1081_L405	171	C/T	99	18	C/T	99	34
E310133_L404	220	G/T	64	9	T	67	13
E310063_L404	213	A/G	70	16	G	93	23
E298120_L404	146	A/T	99	22	T	62	22
E298120_L404	211	C/T	99	16	C	65	13
E277173_L404	148	A/G	74	12	G	70	14
E276196_L404	162	G/T	52	14	T	80	18
E273001_L404	171	C/T	69	18	C	83	18
E268193_L404	128	A/C	60	13	A	99	28
E261548_L404	150	C/G	99	14	C	99	30
E261548_L404	151	C/T	99	14	C	99	30
E260078_L404	174	G/T	59	11	G	99	33
E234816_L404	174	A/C	99	22	C	72	27
E230950_L404	106	A/T	48	8	A	96	24
E230950_L404	116	A/G	92	12	G	99	27
E230950_L404	244	C/T	29	6	T	71	15
E223873_L404	98	G	56	10	G/T	88	14
E216030_L404	188	A	89	21	G	72	27
E208044_L404	189	G	59	10	A/G	53	13
E207113_L404	203	A/T	70	13	T	79	19
E203197_L404	214	C/T	74	11	C	71	14
E198235_L404	131	A/T	93	13	T	96	23
E187585_L404	93	A/C	80	11	C	92	23
E181161_L404	222	C/T	42	14	C	99	25
E175072_L404	159	A/G	69	14	G	37	14
E165182_L404	215	C	62	11	A/C	99	13
E162241_L404	157	C/T	91	13	C	99	34
E162241_L404	215	A/T	76	10	T	98	24
E153977_L404	106	A/G	99	19	A	46	17
E153977_L404	192	A/G	48	18	A	99	39
E153977_L404	195	C/T	54	19	C	99	39
E149175_L404	133	G/T	68	18	T	38	14
E149175_L404	134	A/T	99	18	A	38	14
E149175_L404	203	A	71	14	A/T	94	17
E143067_L404	119	A/G	99	18	G	95	26
E139751_L404	123	G	79	21	C/G	99	21
E137734_L404	92	G	35	13	A	68	13
E135947_L404	154	T	50	7	C/T	63	13
E135947_L404	186	C	59	10	C/T	99	26
E135947_L404	197	A/G	81	12	G	99	27
E132305_L404	141	T	53	8	C/T	74	19
E132109_L404	122	A/C	30	6	A	53	8
E121219_L404	223	A/G	73	13	G	86	21
E116199_L404	131	C/T	99	19	T	99	27
E114637_L404	109	A/C	48	9	A	56	24
E114637_L404	122	A/G	28	9	A	89	23
E112073_L404	115	C/T	99	22	C	99	44
E112073_L404	165	C	71	26	A/C	99	47
E98010_L404	188	A/T	99	28	T	99	40
E92026_L404	107	A/T	49	9	T	89	21
E91831_L404	189	G/T	62	19	T	79	30
E91831_L404	229	A/G	88	13	A	80	17
E86906_L404	102	A	65	12	A/C	99	21
E80790_L404	163	A/G	69	17	A/G	99	19
E80085_L404	149	A/G	33	23	G	99	30
E76902_L404	94	A	56	9	A/G	99	28
E76902_L404	146	G	38	14	A	99	33
E76902_L404	187	A/C	26	15	A/C	82	24
E76877_L404	162	C/G	99	16	C	98	24
E76842_L404	131	C/T	49	12	T	85	19
E75836_L404	249	A/T	37	6	T	65	12
E74318_L404	234	G/T	27	6	G	82	18
E71191_L404	284	A/G	37	30	A	81	48
E62994_L404	151	C/G	31	7	C/G	99	30
E62994_L404	156	A/C	64	12	A/C	99	44
E62994_L404	263	G/T	52	17	G/T	99	33
E62674_L404	161	C/G	50	8	G	80	18
E62304_L404	173	C/T	73	14	C	99	33
E59732_L404	160	G/T	42	7	G	99	26
E59014_L404	179	G	44	5	A/G	66	11
E58594_L404	104	A/C	34	7	A	85	19
E57853_L404	147	A	36	10	A/G	70	61
E56308_L404	184	C/T	99	18	C	99	32
E52356_L404	104	C/T	28	12	T	68	25
E50357_L404	168	A/G	99	17	A/G	99	17
E50337_L404	188	A/G	55	9	G	96	23
E50337_L404	201	A/G	36	9	A	93	22
E45330_L404	206	A/G	89	75	A	99	166
E45330_L404	209	C/T	85	76	C	99	163
E27390_L404	99	C/T	98	15	C	35	13
E7144_L404	169	C/T	90	18	T	93	23
E7144_L404	188	C/T	84	14	T	98	24
E338709_L403	120	A/T	99	15	T	61	30
E338709_L403	121	A/C	99	15	A	61	30
E338709_L403	158	G/T	69	17	T	43	36
E328510_L403	70	A/C	38	5	A	56	9
E321309_L403	195	A/T	80	11	T	99	31
E318600_L403	111	C/T	99	19	T	55	22
E318600_L403	192	G/T	66	10	T	70	17
E314066_L403	180	A/T	75	20	A	54	20
E277002_L403	162	A/G	99	18	A	81	31
E274425_L403	198	C/T	46	11	C	79	17
E272339_L403	153	C/G	38	7	G	59	10
E259827_L403	164	A/G	64	12	A	49	18
E259460_L403	109	A/G	91	13	A	95	23
E249393_L403	104	G/T	58	9	G	32	12
E249393_L403	237	C/T	99	14	C/T	99	22
E247585_L403	111	T	53	8	C/T	99	14
E235526_L403	250	G/T	29	8	G	59	10
E224965_L403	165	G/T	87	11	T	84	19
E215116_L403	77	C/T	69	10	T	65	12
E212257_L403	116	C/T	41	11	C	46	17
E196982_L403	157	T	38	10	C	55	21
E195768_L403	205	C	48	6	C/T	99	21
E194270_L403	103	A/C	69	10	C	59	10
E192138_L403	139	C/G	99	12	C	99	28
E189328_L403	106	A/G	42	10	G	91	22
E186640_L403	163	A/G	99	23	G	99	36
E183138_L403	118	A/G	99	20	G	84	19
E182467_L403	163	A/C	81	12	A	58	22
E175682_L403	207	A/G	86	11	G	99	34
E173720_L403	114	G/T	63	10	G	81	18
E166857_L403	107	C/T	29	7	T	74	15
E161227_L403	86	C/T	42	10	T	80	19
E141586_L403	250	C/T	84	13	T	99	24
E140393_L403	131	C/T	29	5	T	73	15
E140179_L403	147	A/G	76	16	A	98	24
E137303_L403	166	C/T	34	5	T	98	24
E131309_L403	230	G/T	66	16	G	73	15
E130609_L403	97	A/G	33	7	A	65	12
E130609_L403	160	A/G	84	21	G	49	18
E126801_L403	167	A/G	59	12	A/G	99	19
E126801_L403	220	A/C	60	8	A/C	99	24
E122528_L403	170	C/T	99	17	C/T	99	26
E122528_L403	229	G/T	77	14	G/T	94	18
E115826_L403	98	G/T	87	10	T	79	17
E106739_L403	147	A	85	19	A/T	99	35
E99306_L403	236	A/G	99	25	A	26	10
E97302_L403	56	G	44	5	T	26	10
E97302_L403	86	A/C	30	16	A	99	26
E92082_L403	211	C/T	99	21	C/T	62	24
E88244_L403	152	C/T	59	9	C	68	13
E88244_L403	157	A/G	59	9	G	67	13
E85998_L403	96	A	26	9	A/T	99	14
E85575_L403	123	A/G	93	15	A/G	99	18
E85575_L403	125	C/G	99	16	C/G	99	17
E81340_L403	103	G/T	69	33	T	94	23
E81340_L403	181	G	99	63	A/G	91	25
E81171_L403	366	T	25	10	A	47	6
E80692_L403	245	C/T	94	17	T	93	22
E77128_L403	155	A/G	99	13	G	84	19
E74052_L403	158	G/T	99	17	T	70	14
E70622_L403	187	C/T	99	20	C	99	27
E69798_L403	156	G/T	40	9	G/T	99	29
E67421_L403	93	C/T	55	13	T	82	18
E66106_L403	113	A/T	40	23	T	99	73
E66106_L403	136	A/C	99	38	A/C	99	110
E66106_L403	144	A/G	99	42	A/G	99	117
E66106_L403	166	T	99	56	A/T	99	123
E66106_L403	277	A/G	37	7	A/G	43	8
E52874_L403	120	C/T	39	17	C	99	31
E52874_L403	229	C/T	67	10	C/T	85	16
E50147_L403	259	A	53	8	A/G	81	12
E49836_L403	174	A/T	99	17	T	72	15
E46395_L403	127	T	62	11	C/T	99	30
E31301_L403	200	G/T	99	22	T	99	27
E28904_L403	174	A/G	96	15	G	99	35
E27509_L403	110	C/T	56	13	C	73	15
E27509_L403	127	A/G	77	13	G	35	13
E27180_L403	32	C/T	27	36	C/T	99	84
E27180_L403	198	A/G	56	47	G	26	28
E27180_L403	231	A/G	28	116	A/G	37	200
E27180_L403	295	T	32	88	G/T	26	176
E27180_L403	307	G	57	38	G/T	27	56
E27180_L403	379	T	44	27	G/T	32	49
E11430_L403	219	C/T	51	9	C	84	19
E11430_L403	223	G/T	45	8	G	83	19
E4234_L403	136	G/T	99	21	G	50	19
E3205_L403	199	A/G	82	14	A/G	99	32
E2610_L403	316	A/C	99	49	C	94	49
E2610_L403	319	G/T	99	49	T	85	46
E827_L403	106	A/G	25	6	A	53	8
E317440_L402	91	A	47	6	A/T	91	11
E317440_L402	93	C	50	7	C/T	86	11
E306268_L402	165	A/G	62	13	A	99	33
E300856_L402	76	C/T	33	5	T	62	11
E300856_L402	84	C/G	44	5	C	62	11
E300856_L402	169	A/T	38	7	T	91	23
E293170_L402	229	C	26	10	C/T	99	14
E269204_L402	141	A	42	5	A/G	99	14
E268387_L402	136	C/T	99	16	T	68	15
E267175_L402	52	A/T	46	10	A	44	5
E265110_L402	184	C	29	11	A	95	23
E245055_L402	201	C/T	68	10	T	99	45
E239215_L402	124	A/T	36	7	A	99	29
E238595_L402	81	A/T	37	8	A	67	13
E236759_L402	234	A/G	32	5	G	62	11
E233402_L402	57	A	47	6	T	32	12
E217286_L402	232	G/T	66	11	G	62	12
E215090_L402	143	C/T	86	13	C	62	11
E213957_L402	201	C/T	54	13	T	99	41
E212148_L402	211	A/T	99	15	T	82	18
E212148_L402	213	A/C	79	14	A	47	17
E204881_L402	144	A/G	99	27	A/G	99	26
E204736_L402	106	C/T	39	6	C	79	17
E197105_L402	151	G	91	21	A/G	99	32
E197091_L402	98	A/G	64	12	A	62	11
E178305_L402	244	G/T	35	6	T	47	6
E172555_L402	252	C/T	30	6	T	50	7
E172434_L402	196	G	50	7	C/G	63	11
E168837_L402	237	A/C	32	6	C	62	11
E163627_L402	81	A/T	71	10	A	52	19
E159888_L402	237	C/T	36	19	T	47	26
E158321_L402	78	G/T	41	8	G	80	17
E158321_L402	83	A/C	74	10	A	87	21
E150291_L402	148	A/G	66	17	G	63	24
E149441_L402	197	C/T	78	15	C	56	9
E147288_L402	100	C/T	39	7	C	62	11
E147288_L402	219	A/G	99	18	A	99	25
E147264_L402	172	C/T	99	20	C	88	20
E142964_L402	240	A/T	31	8	A	35	13
E142509_L402	60	A/G	70	10	A/G	33	11
E142509_L402	131	A/C	40	21	C	99	36
E142509_L402	191	A/G	67	13	A/G	99	46
E140032_L402	184	A/T	31	7	A/T	52	13
E135345_L402	221	A/G	99	23	A	79	17
E132836_L402	221	G/T	84	13	T	78	17
E128848_L402	207	A/T	99	16	A	81	31
E127766_L402	69	A/C	61	11	C	53	8
E127766_L402	250	A	56	9	A/G	99	22
E126511_L402	217	A/G	50	7	G	59	10
E120351_L402	162	C/T	52	13	C	99	28
E114798_L402	247	A/G	40	6	A	56	9
E112095_L402	111	A/T	38	6	T	73	15
E110848_L402	201	C/G	53	14	C	78	31
E110319_L402	170	C	32	12	C/T	99	37
E103385_L402	204	A/C	33	5	C	59	10
E103192_L402	312	A/G	47	12	A	60	40
E85927_L402	241	A/G	33	6	A	71	14
E84388_L402	64	A/T	59	10	A	68	13
E82198_L402	164	A/G	45	17	G	65	12
E77795_L402	108	A/G	86	14	A	83	18
E74016_L402	154	T	62	11	G/T	85	14
E58050_L402	174	A/G	53	13	A	53	26
E58050_L402	209	A/G	60	12	G	99	25
E57303_L402	87	A/G	71	9	A	74	15
E40919_L402	109	C/T	86	17	T	62	11
E40919_L402	194	A/C	84	17	C	61	23
E36539_L402	102	A/T	99	13	T	29	11
E36339_L402	128	A/C	71	12	A/C	99	14
E23762_L402	185	T	53	8	G/T	99	20
E20097_L402	108	A/G	99	19	A	71	27
E20097_L402	139	A/T	70	13	T	99	27
E13026_L402	95	G/T	65	13	G	77	17
E13026_L402	185	T	44	5	A/T	99	11
E6374_L402	109	A/G	32	12	G	77	19
E4701_L402	183	A/T	99	32	A	99	36
E4701_L402	210	A/T	99	31	A	99	42
E428_L402	163	G/T	99	21	G	99	28
E316946_L401	109	C/T	48	10	C/T	51	9
E290769_L401	143	A/C	44	8	C	99	26
E290769_L401	175	C/T	82	10	C	85	20
E290371_L401	183	C/T	99	13	T	78	17
E279006_L401	166	C/T	94	19	T	65	24
E279006_L401	199	C/T	99	16	T	76	16
E277427_L401	106	C/T	25	7	C	74	15
E277427_L401	239	T	53	8	C/T	99	17
E267748_L401	175	C	35	13	A/C	48	20
E266267_L401	234	A/G	41	8	G	70	15
E266267_L401	236	A/G	57	8	G	68	14
E264671_L401	171	C/T	99	16	T	98	24
E262148_L401	191	A/G	99	18	A	97	25
E261076_L401	208	A/G	89	14	G	56	9
E261076_L401	209	A/G	96	14	A	56	9
E246656_L401	169	A/C	72	11	A	99	27
E246240_L401	214	A	47	6	A/G	81	17
E242001_L401	280	A/T	58	12	A	49	22
E240987_L401	147	G/T	99	20	G	91	23
E240987_L401	189	C/T	99	29	T	99	47
E239315_L401	93	T	47	6	C	29	11
E228957_L401	227	G/T	31	5	G	65	12
E219996_L401	162	A/C	99	19	A/C	99	34
E206111_L401	153	C/T	50	10	C	99	25
E202636_L401	87	A/G	99	19	G	38	14
E202636_L401	136	G	99	25	G/T	97	20
E202636_L401	220	A/G	99	14	A	99	28
E202636_L401	227	A/T	99	14	A	99	26
E197416_L401	148	C	44	16	T	99	28
E195375_L401	195	G/T	31	5	G	99	25
E190608_L401	62	G	50	7	T	40	15
E190180_L401	217	C/T	32	7	T	91	22
E189971_L401	189	A/C	58	8	A	41	15
E189967_L401	148	A/T	55	10	T	90	21
E186096_L401	176	C/T	99	18	T	99	26
E186096_L401	242	C/T	51	9	T	73	15
E176119_L401	133	A/G	38	10	G	44	17
E166050_L401	113	A/C	49	9	C	79	17
E161214_L401	135	A/T	99	23	A/T	99	25
E157009_L401	129	A/G	99	13	G	86	21
E157009_L401	196	A/G	37	13	A	99	28
E154033_L401	120	A/G	99	22	G	45	17
E151206_L401	46	A/T	32	114	A	43	80
E151206_L401	91	A/C	57	127	C	46	96
E151206_L401	212	A/C	93	75	A	97	35
E151206_L401	308	A/T	73	61	T	99	27
E151206_L401	368	G/T	59	43	G	81	18
E151206_L401	390	A/T	32	15	T	50	7
E148386_L401	127	A/G	99	16	G	79	17
E146784_L401	143	C/T	79	20	T	99	32
E111838_L401	241	A/C	91	24	C	59	10
E106845_L401	191	A/T	72	11	A	59	10
E96159_L401	178	A/G	70	13	A	70	18
E93497_L401	186	G/T	62	16	T	88	20
E93497_L401	220	A/G	31	14	A	90	21
E77602_L401	158	G/T	67	36	G	73	59
E76702_L401	152	C/T	58	14	T	41	15
E71141_L401	103	A/C	51	10	A	56	9
E71141_L401	104	C/G	56	10	C	57	9
E71104_L401	181	C/G	31	11	G	99	26
E67488_L401	181	C/T	99	26	C	99	38
E67488_L401	194	C/T	99	28	T	99	37
E59143_L401	54	C/T	26	8	C	59	10
E59143_L401	64	T	53	8	G/T	65	14
E59143_L401	91	C/G	44	14	G	49	18
E59143_L401	118	G	38	14	A/G	97	18
E53492_L401	123	A/T	99	17	A	86	20
E51570_L401	156	A/G	99	22	A	99	33
E41813_L401	51	G/T	32	10	G	68	13
E41813_L401	119	G	99	31	G/T	99	51
E38599_L401	307	A/G	99	25	A/G	99	42
E38599_L401	314	C	57	25	C/T	25	42
E33261_L401	108	C/G	57	12	G	70	14
E33261_L401	110	A/G	34	13	A	74	15
E33261_L401	129	C/T	64	15	C	44	16
E33261_L401	196	A/G	99	22	G	68	25
E32888_L401	145	A/C	52	11	C	97	24
E30002_L401	182	A/G	99	24	A	99	26
E316211_L400	207	G/T	51	13	G/T	99	24
E300879_L400	145	A/G	81	11	A/G	99	21
E298388_L400	139	A	71	14	A/T	99	25
E298113_L400	97	A	50	7	A/T	99	19
E288786_L400	97	A/G	99	12	G	68	13
E287656_L400	86	A/T	57	11	T	81	18
E287656_L400	234	G/T	99	16	T	52	19
E287114_L400	269	A/G	48	8	G	53	8
E282299_L400	208	C/G	32	15	C	59	10
E280484_L400	150	C/T	80	15	T	84	19
E272841_L400	119	A/C	54	12	C	66	13
E270454_L400	209	G/T	99	22	G/T	75	20
E266574_L400	77	A/G	36	8	A	59	11
E266574_L400	166	A/C	33	14	C	71	26
E261881_L400	226	A/T	99	13	T	89	23
E260051_L400	160	A/G	99	25	A	96	39
E246558_L400	230	T	53	8	A/T	58	16
E243487_L400	146	A/G	27	9	A/G	99	22
E234998_L400	64	A/T	99	11	T	71	14
E229315_L400	143	A/G	25	9	G	44	16
E224502_L400	172	A/C	74	17	C	99	25
E223492_L400	150	A/G	32	6	A	65	12
E222256_L400	90	G/T	99	18	T	90	22
E222256_L400	121	A/T	99	22	T	99	30
E212215_L400	191	C/T	41	8	C	81	18
E212215_L400	193	C/T	56	8	T	75	16
E211671_L400	70	A/T	62	11	A	79	17
E210975_L400	156	G/T	38	9	G	56	9
E196592_L400	95	A/G	63	8	G	81	19
E196592_L400	170	A/G	99	16	G	49	18
E196592_L400	185	A/C	94	15	A	52	19
E184553_L400	155	A/C	97	13	C	99	27
E180483_L400	169	A/T	99	12	T	99	30
E176901_L400	88	C	51	7	A/C	99	18
E176901_L400	212	C	74	15	C/T	99	24
E159801_L400	189	A/C	88	14	C	96	37
E159801_L400	191	C/T	78	13	T	95	37
E156717_L400	85	C	50	7	C/T	55	12
E152870_L400	166	A/G	61	12	G	99	35
E145133_L400	231	C/T	39	11	C	88	20
E131642_L400	61	A	46	6	A/G	33	6
E131642_L400	164	A/G	99	22	G	99	40
E130349_L400	161	A/T	86	15	T	62	22
E130349_L400	172	A/G	83	15	G	94	24
E130349_L400	188	A/T	99	16	T	97	24
E129226_L400	79	A/G	38	12	A	88	20
E129226_L400	116	C/T	99	22	T	99	38
E122380_L400	203	C	79	17	C/G	99	30
E118943_L400	86	C/T	99	33	T	67	99
E117549_L400	150	C/T	40	6	C	75	23
E116887_L400	164	A/T	95	15	A	74	15
E114105_L400	81	A/C	61	8	C	29	12
E114105_L400	144	C/T	58	9	C	99	28
E114105_L400	182	A/G	60	13	G	69	25
E112057_L400	148	A/G	99	15	G	85	20
E111551_L400	87	G/T	43	6	G	56	9
E111551_L400	121	A/G	99	13	A/G	99	17
E106964_L400	147	A/C	99	29	A	75	29
E106844_L400	173	C/T	99	15	C	70	26
E106544_L400	221	C/G	30	7	C	73	15
E103429_L400	160	C/G	99	23	G	99	31
E89000_L400	228	C/T	93	13	T	79	18
E88284_L400	204	A/G	99	17	G	76	16
E87770_L400	70	A/G	49	7	G	56	9
E87770_L400	85	G	59	10	G/T	43	15
E87770_L400	86	A	59	10	A/G	51	15
E87770_L400	126	C	32	12	A/C	99	19
E87770_L400	141	A/T	99	14	T	85	19
E69085_L400	220	A/T	52	13	T	76	16
E59144_L400	58	A/G	77	17	A	62	11
E59144_L400	193	G/T	99	23	G	68	26
E55365_L400	85	A/C	77	19	A/C	63	13
E55365_L400	88	G/T	89	19	G/T	76	14
E55365_L400	160	A	44	5	G	29	11
E55365_L400	317	T	56	11	C/T	80	25
E51804_L400	100	A/G	83	11	G	78	17
E43361_L400	210	A/G	79	16	G	60	22
E41814_L400	112	A/G	46	37	A	99	78
E29216_L400	67	T	71	21	A/T	99	41
E29216_L400	206	G	43	25	A/G	37	119
E27603_L400	79	C/G	99	112	C/G	99	195
E27603_L400	142	C/T	29	41	C/T	99	84
E22400_L400	205	C/T	46	13	C	99	26
E22400_L400	221	A/T	85	14	T	62	22
E10707_L400	110	A/T	66	8	A	99	29
E10707_L400	168	G/T	37	17	T	99	48
E8839_L400	107	G	34	13	A	50	7
E8839_L400	119	C/T	61	14	C	48	6
E8839_L400	185	T	40	18	C	76	16
E8839_L400	188	A/G	86	18	A	76	16
E323182_L399	205	A/T	29	9	A	59	10
E310970_L399	201	C	62	11	C/G	73	17
E301706_L399	223	A/T	62	13	A/T	98	14
E267476_L399	162	A/C	99	19	A	99	47
E253083_L399	106	A/G	32	7	G	75	16
E253083_L399	222	C/T	29	9	C	80	17
E250397_L399	215	T	44	5	A/T	49	12
E246783_L399	106	A/T	29	8	A/T	40	15
E246783_L399	190	C	81	18	A/C	99	17
E245275_L399	143	C	53	8	C/T	75	12
E241648_L399	167	A/G	99	41	A	67	24
E241591_L399	93	A/C	33	7	A	74	15
E232601_L399	110	A/G	69	20	A/G	99	33
E232601_L399	185	A/C	65	19	A	95	23
E225792_L399	182	C/T	68	12	C	77	16
E219837_L399	63	A/T	28	5	A	51	7
E216141_L399	104	G/T	99	14	T	75	16
E196767_L399	116	G/T	99	16	G	53	22
E190036_L399	221	A/C	41	11	A	35	13
E187222_L399	175	A	26	10	A/T	99	16
E183417_L399	93	G/T	99	13	T	82	18
E183417_L399	125	A/C	66	12	A	52	20
E182786_L399	43	A/G	31	12	A	78	17
E182786_L399	167	C/T	27	10	C	99	27
E180038_L399	57	A/T	33	19	A	79	17
E173442_L399	48	A/C	40	7	A	43	16
E173442_L399	220	C/T	99	16	T	29	11
E171042_L399	126	A	88	20	A/T	99	22
E163796_L399	169	A	56	9	A/G	99	20
E163454_L399	122	A/T	99	16	T	99	24
E130996_L399	204	G/T	99	19	T	84	32
E130447_L399	117	C	44	5	C/T	99	22
E124771_L399	215	C/T	26	6	C	89	21
E123727_L399	131	A/G	66	10	G	41	15
E123727_L399	198	C/T	60	11	T	81	18
E123727_L399	231	G/T	38	8	T	53	8
E113042_L399	119	C/T	78	11	C	71	14
E112533_L399	77	A/G	29	5	G	48	7
E109122_L399	268	A/T	38	10	A/T	60	7
E102597_L399	150	A/G	26	10	A	71	25
E91064_L399	87	G/T	32	6	G	90	21
E90264_L399	156	A/T	99	25	A/T	99	27
E88954_L399	135	A/G	62	18	A	99	29
E88399_L399	130	C/T	86	19	C	99	33
E75410_L399	54	A/C	54	7	A	59	10
E75410_L399	217	C/T	85	12	C	26	10
E74075_L399	106	A/C	57	8	A	76	24
E73968_L399	239	A/G	85	13	A	29	11
E72762_L399	126	G	45	5	A/G	99	14
E68004_L399	57	C/T	42	6	T	26	10
E59496_L399	226	A/G	78	14	A	99	26
E59496_L399	260	A/C	57	7	C	62	11
E53563_L399	234	C/T	31	9	C	95	23
E48791_L399	150	A/T	99	14	A	62	11
E47467_L399	116	C/T	99	22	T	99	31
E45339_L399	212	A/G	35	11	A/G	99	40
E41605_L399	95	C	43	18	C/T	27	37
E41605_L399	150	T	99	29	G/T	99	38
E41605_L399	175	A/G	82	29	G	99	32
E41605_L399	178	A/G	99	31	A/G	99	34
E41605_L399	241	A/T	99	27	A/T	99	25
E41605_L399	269	C/T	47	20	C/T	61	14
E36690_L399	189	A/T	99	26	T	99	36
E32182_L399	100	A/T	72	11	A	77	18
E31774_L399	186	G/T	99	13	G	73	15
E23121_L399	186	A/G	54	40	G	31	59
E23121_L399	217	C	30	51	C/T	39	65
E22193_L399	209	G/T	41	16	T	33	41
E22119_L399	85	C/T	48	13	C	90	22
E22119_L399	155	A/G	42	18	A/G	92	17
E21910_L399	206	A/G	99	15	G	78	17
E15182_L399	99	C/G	90	13	C	83	18
E3295_L399	130	C/G	75	11	C	96	23
E304479_L398	112	C/G	67	9	G	50	8
E304479_L398	166	C/T	26	15	C	82	46
E300940_L398	180	C/T	39	10	T	74	15
E299918_L398	252	A/G	50	13	A	26	10
E296774_L398	116	A/T	38	5	T	56	9
E288591_L398	174	A/T	96	23	A	94	22
E263036_L398	138	C	53	8	C/T	67	19
E260930_L398	189	C/T	32	8	T	87	20
E253238_L398	144	G	31	10	G/T	99	15
E249218_L398	143	C/T	67	11	T	99	33
E249218_L398	144	C/T	53	11	C	99	32
E249218_L398	148	G	62	11	A/G	99	36
E246723_L398	184	G	50	8	A/G	33	22
E246311_L398	241	A/G	37	6	G	73	15
E239057_L398	209	A/C	82	12	A	87	20
E236824_L398	95	A/T	31	5	A/T	59	9
E236014_L398	170	A/T	99	17	T	97	25
E231600_L398	191	G	96	25	G/T	99	32
E231252_L398	135	A/G	77	13	A	99	28
E230815_L398	142	A/C	99	18	C	80	17
E230815_L398	221	A/G	66	11	G	59	11
E229296_L398	87	A/T	99	14	A	47	17
E229296_L398	176	C/T	99	19	C/T	99	25
E223341_L398	211	A/T	82	12	A	77	16
E219425_L398	63	C/T	51	7	T	59	10
E219333_L398	97	C/T	99	22	T	32	12
E219333_L398	163	A/G	99	26	A	70	28
E217830_L398	134	C/G	33	9	C	91	23
E208301_L398	64	C/T	56	7	T	59	10
E208301_L398	107	G/T	99	19	G	99	27
E196585_L398	220	T	27	10	G	60	25
E196187_L398	236	A/G	67	10	A/G	80	12
E187925_L398	96	A/G	56	8	A/G	99	19
E180020_L398	170	C	65	26	G	99	30
E175721_L398	141	G/T	86	19	T	51	19
E159768_L398	156	C/T	38	5	C	31	12
E143316_L398	215	C	62	11	C/T	99	33
E134745_L398	131	C/T	37	14	T	82	18
E125873_L398	55	G	43	14	G/T	55	35
E125873_L398	148	C/T	34	26	C/T	99	30
E125873_L398	177	A	52	25	A/C	78	29
E124459_L398	142	A/G	99	25	A/G	33	86
E105897_L398	132	A/G	78	22	A	89	21
E103874_L398	117	C/T	74	10	T	99	28
E103874_L398	226	A/G	79	14	A	65	12
E103579_L398	304	A/C	25	6	A	32	12
E87504_L398	220	A/G	68	15	G	99	27
E76599_L398	168	A/T	60	12	T	29	11
E69033_L398	193	C/T	31	9	C	83	18
E66306_L398	61	G	65	12	G/T	33	10
E62277_L398	114	G/T	44	6	G/T	62	8
E62277_L398	119	A/G	27	6	A/G	56	8
E62277_L398	240	G	65	12	G/T	63	12
E61985_L398	257	C	54	8	C/T	34	8
E56286_L398	138	A/G	75	13	G	99	29
E56286_L398	207	A	44	16	G	99	39
E56250_L398	155	C/T	26	14	T	72	15
E54922_L398	50	G/T	46	15	G/T	85	34
E54922_L398	126	C/G	99	32	C/G	99	52
E54922_L398	187	T	28	13	A/T	34	34
E54236_L398	63	A	77	16	A/T	32	8
E54236_L398	86	C	92	22	C/T	66	16
E49201_L398	217	A/G	99	23	G	38	14
E49201_L398	222	C/T	94	20	T	65	12
E48494_L398	63	A/G	42	11	G	50	7
E43447_L398	169	A/G	78	15	G	84	21
E41376_L398	222	T	44	5	A/T	46	6
E40996_L398	236	C	29	11	G	65	12
E36589_L398	91	A/T	44	11	T	49	24
E34531_L398	124	G/T	78	11	G	90	22
E32451_L398	150	C/T	89	28	C/T	68	39
E32451_L398	152	C/T	99	28	C/T	99	39
E32451_L398	155	C/T	83	28	C/T	70	39
E32451_L398	209	A/C	86	13	A/C	99	25
E26288_L398	131	C	53	8	T	47	17
E13076_L398	141	C/T	99	32	C/T	79	72
E13076_L398	178	A/G	99	55	A/G	99	128
E13076_L398	220	A/C	99	57	A/C	99	120
E13076_L398	237	A/G	53	52	A/G	71	102
E13076_L398	279	A/G	58	8	A/G	68	21
E10080_L398	191	A/C	99	17	C	71	14
E327154_L397	153	A/G	40	6	G	53	8
E322315_L397	132	A/T	81	9	T	82	18
E322315_L397	133	C/G	78	9	C	82	18
E322315_L397	190	C	65	12	C/T	99	19
E300642_L397	204	A/C	60	14	A	99	30
E289548_L397	80	C/T	88	19	C/T	99	16
E288574_L397	104	C	68	13	C/T	99	33
E285641_L397	73	A/C	31	7	A	82	18
E284842_L397	120	A/C	99	13	A	88	20
E284203_L397	178	C/T	99	14	C	92	22
E265038_L397	224	C/T	95	13	C	99	34
E261038_L397	108	A/G	38	12	A	74	15
E261038_L397	203	A/G	36	12	G	86	21
E259230_L397	137	A/G	99	17	G	99	32
E259230_L397	191	A/C	60	12	C	99	35
E241207_L397	189	C/G	99	21	C	99	45
E223948_L397	32	A/G	56	24	G	48	56
E222523_L397	104	A/G	94	11	A/G	96	22
E221138_L397	113	G/T	77	10	G	79	17
E220146_L397	185	A/T	99	23	T	99	34
E217658_L397	149	C/T	47	18	T	94	37
E200147_L397	229	C	26	10	T	59	10
E195538_L397	219	A/G	37	10	G	72	15
E195538_L397	239	A/G	38	10	G	51	7
E191163_L397	113	C/T	99	24	T	98	24
E184531_L397	223	A/T	56	22	T	64	58
E175590_L397	237	A/G	25	8	G	56	9
E173423_L397	231	A/T	59	23	T	99	46
E173423_L397	243	A/C	88	25	A	99	55
E173089_L397	63	A/C	58	8	C	76	16
E173089_L397	88	A/G	99	18	A	90	21
E169275_L397	128	A/T	94	15	A	99	30
E169006_L397	165	A/G	99	18	A	69	25
E160089_L397	142	G/T	43	9	T	79	17
E160089_L397	143	G/T	60	9	G	78	17
E160089_L397	167	A/T	25	9	A	58	22
E158816_L397	127	C/T	99	19	C/T	99	29
E155124_L397	170	A/C	99	13	C	98	24
E155124_L397	199	C/T	93	14	C	99	32
E150520_L397	207	A/T	90	20	A	88	20
E145686_L397	162	A/T	99	21	A	99	30
E140908_L397	115	C/T	38	8	C	74	15
E140908_L397	142	A/G	68	16	A	71	15
E140357_L397	212	A/T	99	14	A	62	11
E140357_L397	249	C/T	34	10	C	47	6
E132262_L397	145	C	29	11	C/T	99	18
E131651_L397	126	A/G	83	13	A	85	20
E125889_L397	232	C/T	46	32	T	50	39
E120408_L397	120	C/T	51	19	T	32	13
E119476_L397	74	C/T	40	13	C/T	99	17
E119476_L397	76	A/C	43	15	A/C	99	17
E119476_L397	257	A/T	48	13	A/T	77	11
E115578_L397	100	G	49	18	G/T	94	25
E108956_L397	222	C/T	99	14	C	99	34
E108956_L397	229	A/T	99	15	A	99	32
E108956_L397	303	C/T	94	21	T	74	29
E106944_L397	221	C/G	99	15	G	87	20
E103370_L397	80	G/T	64	12	T	95	24
E103370_L397	104	C/T	86	14	T	75	28
E103370_L397	145	C/T	80	14	C	97	25
E100924_L397	189	T	40	15	G/T	77	19
E91794_L397	103	A/G	33	7	G	70	14
E83440_L397	80	G	68	13	A/G	99	19
E82425_L397	126	C	50	9	C/T	82	14
E78036_L397	252	G/T	65	10	G	72	15
E76060_L397	168	G/T	96	16	T	87	20
E72749_L397	105	C	29	11	C/T	99	17
E55800_L397	139	C	47	6	C/T	99	33
E36745_L397	70	G	50	7	G/T	99	30
E36745_L397	73	G	50	7	G/T	99	32
E36745_L397	102	C/T	99	18	C/T	99	56
E36745_L397	133	A/G	30	31	G	99	69
E36745_L397	226	A/T	99	15	A/T	98	57
E36734_L397	80	C/T	32	11	C/T	99	31
E36734_L397	121	C/T	57	13	C/T	99	29
E34581_L397	152	A/G	62	14	A	65	12
E34065_L397	54	G	99	35	A/G	30	65
E34065_L397	64	C/T	99	52	T	66	86
E34065_L397	77	A/T	99	75	A/T	99	111
E34065_L397	103	C	60	97	C/T	99	134
E34065_L397	118	A/T	69	86	A/T	27	114
E34065_L397	132	C/G	44	77	C/G	47	104
E14928_L397	125	A/G	77	12	G	74	16
E13334_L397	208	A/G	83	11	A	99	35
E7680_L397	145	C/T	44	15	T	47	21
E5637_L397	109	C/T	64	11	C	44	16
E3864_L397	235	G/T	99	12	T	62	11
E327789_L396	125	A/G	99	24	A/G	47	42
E325380_L396	129	C/T	36	7	C	70	14
E322451_L396	81	C/T	83	13	C	56	21
E262207_L396	154	C/G	92	11	G	72	23
E254947_L396	231	C/T	65	9	C	99	29
E248387_L396	67	C/T	32	8	T	28	11
E248387_L396	145	C/T	99	16	C	99	30
E248387_L396	225	G/T	33	6	T	99	31
E232630_L396	118	C/T	68	12	T	44	16
E228470_L396	168	A	70	14	A/G	98	26
E223936_L396	164	G/T	98	24	T	96	23
E223104_L396	216	A/C	69	28	C	99	29
E217626_L396	206	C/T	33	14	C	82	18
E217626_L396	208	C/T	26	14	T	83	18
E217234_L396	203	G	79	17	A/G	97	18
E205154_L396	130	A/T	91	11	A	79	17
E202951_L396	190	A/G	44	11	A	94	23
E197023_L396	239	A/G	27	9	A	96	23
E196744_L396	166	C/T	99	16	C	70	26
E196744_L396	177	A/G	99	20	A/G	99	25
E181501_L396	93	T	44	5	C/T	40	14
E181501_L396	132	A/G	36	7	G	84	19
E176550_L396	179	A/C	77	24	C	91	22
E175318_L396	77	G/T	35	7	G	68	13
E169102_L396	76	C/T	49	9	T	65	12
E169102_L396	86	C/G	99	13	G	76	16
E169102_L396	189	C/T	99	23	T	43	16
E162065_L396	222	C/T	72	10	T	65	12
E159063_L396	134	C/T	85	12	T	72	15
E151043_L396	108	A/G	45	13	G	54	27
E151043_L396	181	C/T	99	26	C	86	29
E149843_L396	256	C/G	34	10	C/G	28	27
E147313_L396	229	G	53	8	G/T	29	6
E136774_L396	77	T	65	12	A/T	99	31
E136774_L396	120	G	59	10	A/G	99	49
E135604_L396	120	C	27	10	C/G	99	17
E130463_L396	166	C/G	28	32	C/G	31	56
E130463_L396	257	C/T	35	19	C/T	99	28
E130067_L396	139	C/T	53	17	C	49	18
E130067_L396	198	A/C	99	23	C	85	19
E130067_L396	253	A/T	34	5	A	56	9
E129251_L396	202	A/T	58	15	A	89	21
E121072_L396	73	G/T	76	12	G	82	18
E116520_L396	252	C	53	8	A/C	86	11
E92834_L396	67	G/T	58	9	G	27	10
E85827_L396	74	A/C	55	10	C	54	8
E83210_L396	158	A/G	99	17	A	61	24
E81304_L396	146	C/T	99	23	C	84	19
E81304_L396	176	C/T	76	27	C/T	99	20
E78017_L396	78	A/T	47	11	T	92	22
E71944_L396	171	C/T	68	14	C/T	99	27
[truncated: 75,636 more rows]
